# Supplementary material
Source: PubMed Central journal article supplement (PMC3966524)

## SUPPLEMENTARY MATERIAL

For

### **Synthesis and Characterisation of Arsenolipids: Naturally Occurring Arsenic Compounds in Fish and Algae**

Mojtaba S. Taleshi, Rune K. Seidler-Egdal, Kenneth B Jensen, Tanja Schwerdtle, Kevin A. Francesconi\*

Institute of Chemistry - Analytical Chemistry, University of Graz, Universitaetsplatz 1, Graz, Austria  
Faculty of Marine Science, Marine Chemistry, University of Mazandaran, Babolsar, Iran  
Institute of Nutritional Sciences, University of Potsdam, Arthur-Scheunert-Allee 114-116  
14558 Nuthetal, OT Bergholz-Rehbrücke, Germany

## CONTENTS

### **<sup>1</sup>H & <sup>13</sup>C NMR spectra for:**

- 15-dimethylarsinyl pentadecanoic acid (**1**, As-FA 362)
- 19-Dimethylarsinyl-nonadecanoic acid (**2**, As-FA 418)
- 17-dimethylarsinyl-9-heptadecenoic acid (**3**, As-FA 388)
- 16-dimethylarsinyl-9-hexadecenoic acid (**4**, As-FA 374)
- 1-dimethylarsinyl-pentadecane (**5**, As-HC 332)
- 1-dimethylarsinyl-heptadecane (**6**, As-HC 360)

### **<sup>1</sup>H NMR spectra for:**

- 1-Dimethylarsinyltricosane (**7**, As-HC 444)

### **High resolution mass spectra & tandem mass spectra for:**

- 15-dimethylarsinyl pentadecanoic acid (**1**, As-FA 362)
- 19-Dimethylarsinyl-nonadecanoic acid (**2**, As-FA 418)
- 17-dimethylarsinyl-9-heptadecenoic acid (**3**, As-FA 388)
- 16-dimethylarsinyl-9-hexadecenoic acid (**4**, As-FA 374)
- 1-dimethylarsinyl-pentadecane (**5**, As-HC 332)
- 1-dimethylarsinyl-heptadecane (**6**, As-HC 360)
- 1-Dimethylarsinyltricosane (**7**, As-HC 444)

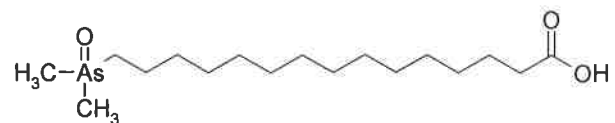

15-dimethylarsinyl pentadecanoic acid (1, As-FA 362)

$^1\text{H}$  NMR (MeOH- $d_4$ , 300 MHz): 1.2-1.5 (m, 20H, 10-CH<sub>2</sub>),  
1.6 (m, 4H, 2-CH<sub>2</sub>), 1.7 (s, 6H, -As(CH<sub>3</sub>)<sub>2</sub>), 2.1 (m, 2H, -As-CH<sub>2</sub>),  
2.3 (t,  $J = 7.5$  Hz, 2H, -CH<sub>2</sub>-COOH).

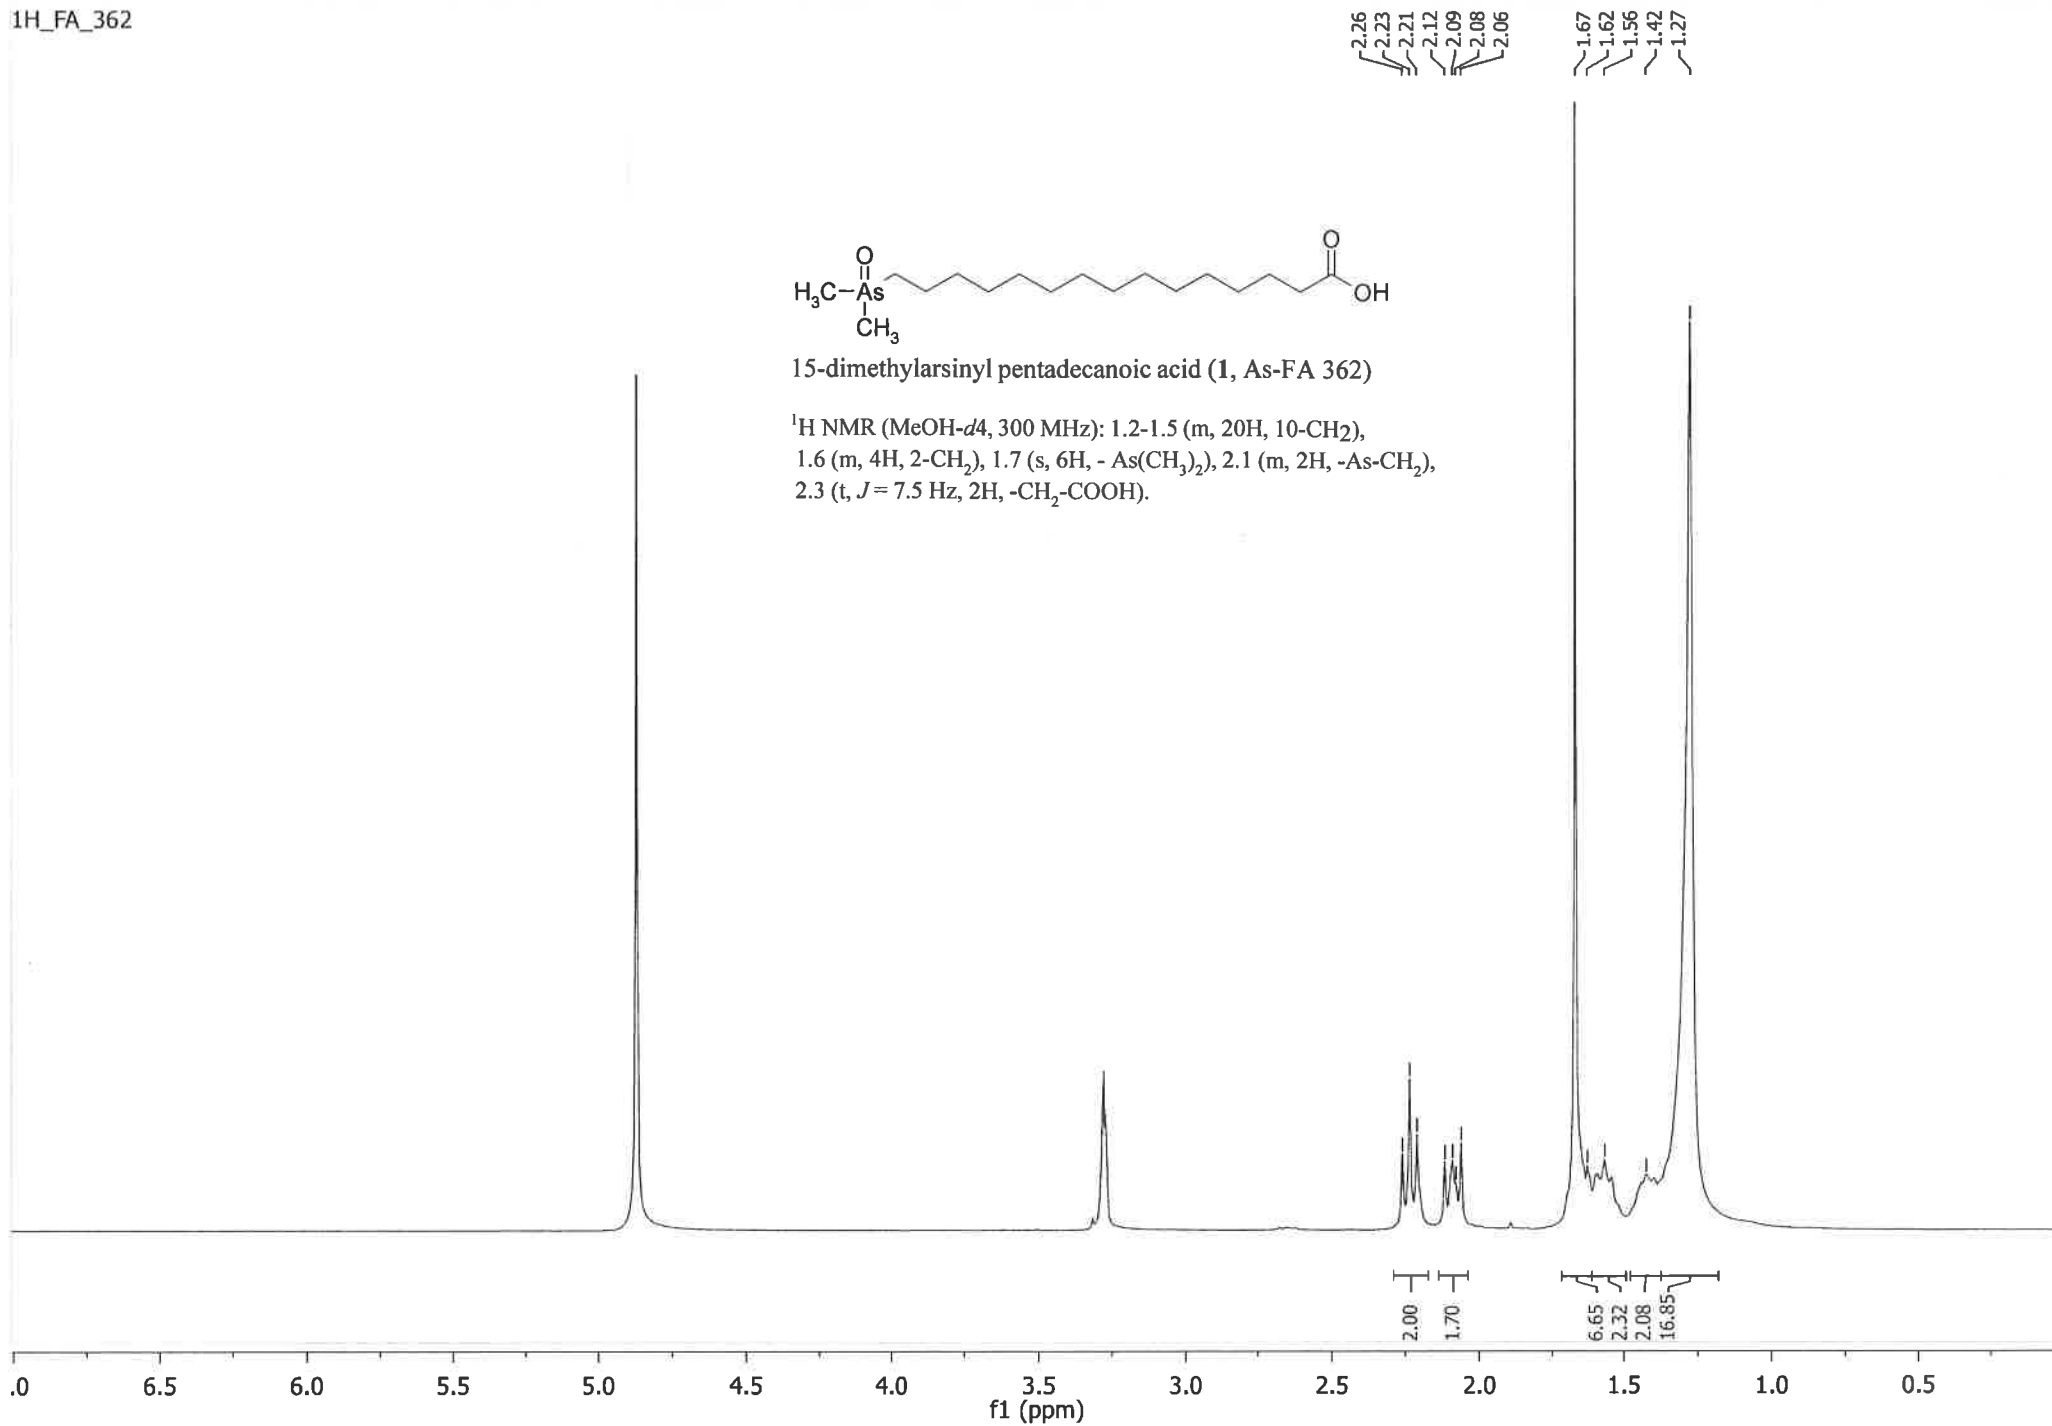

13C\_FA\_362

—176.61

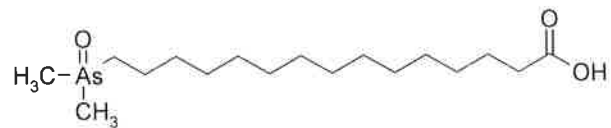

15-dimethylarsinyl pentadecanoic acid (1, As-FA 362)

$^{13}\text{C}\{^1\text{H}\}$  NMR (MeOH- $d_4$ , 75 MHz):  $\delta$  12.1, 21.6, 24.7, 28.7, 29.0, 29.1, 29.2, 30.2, 30.3, 176.6.

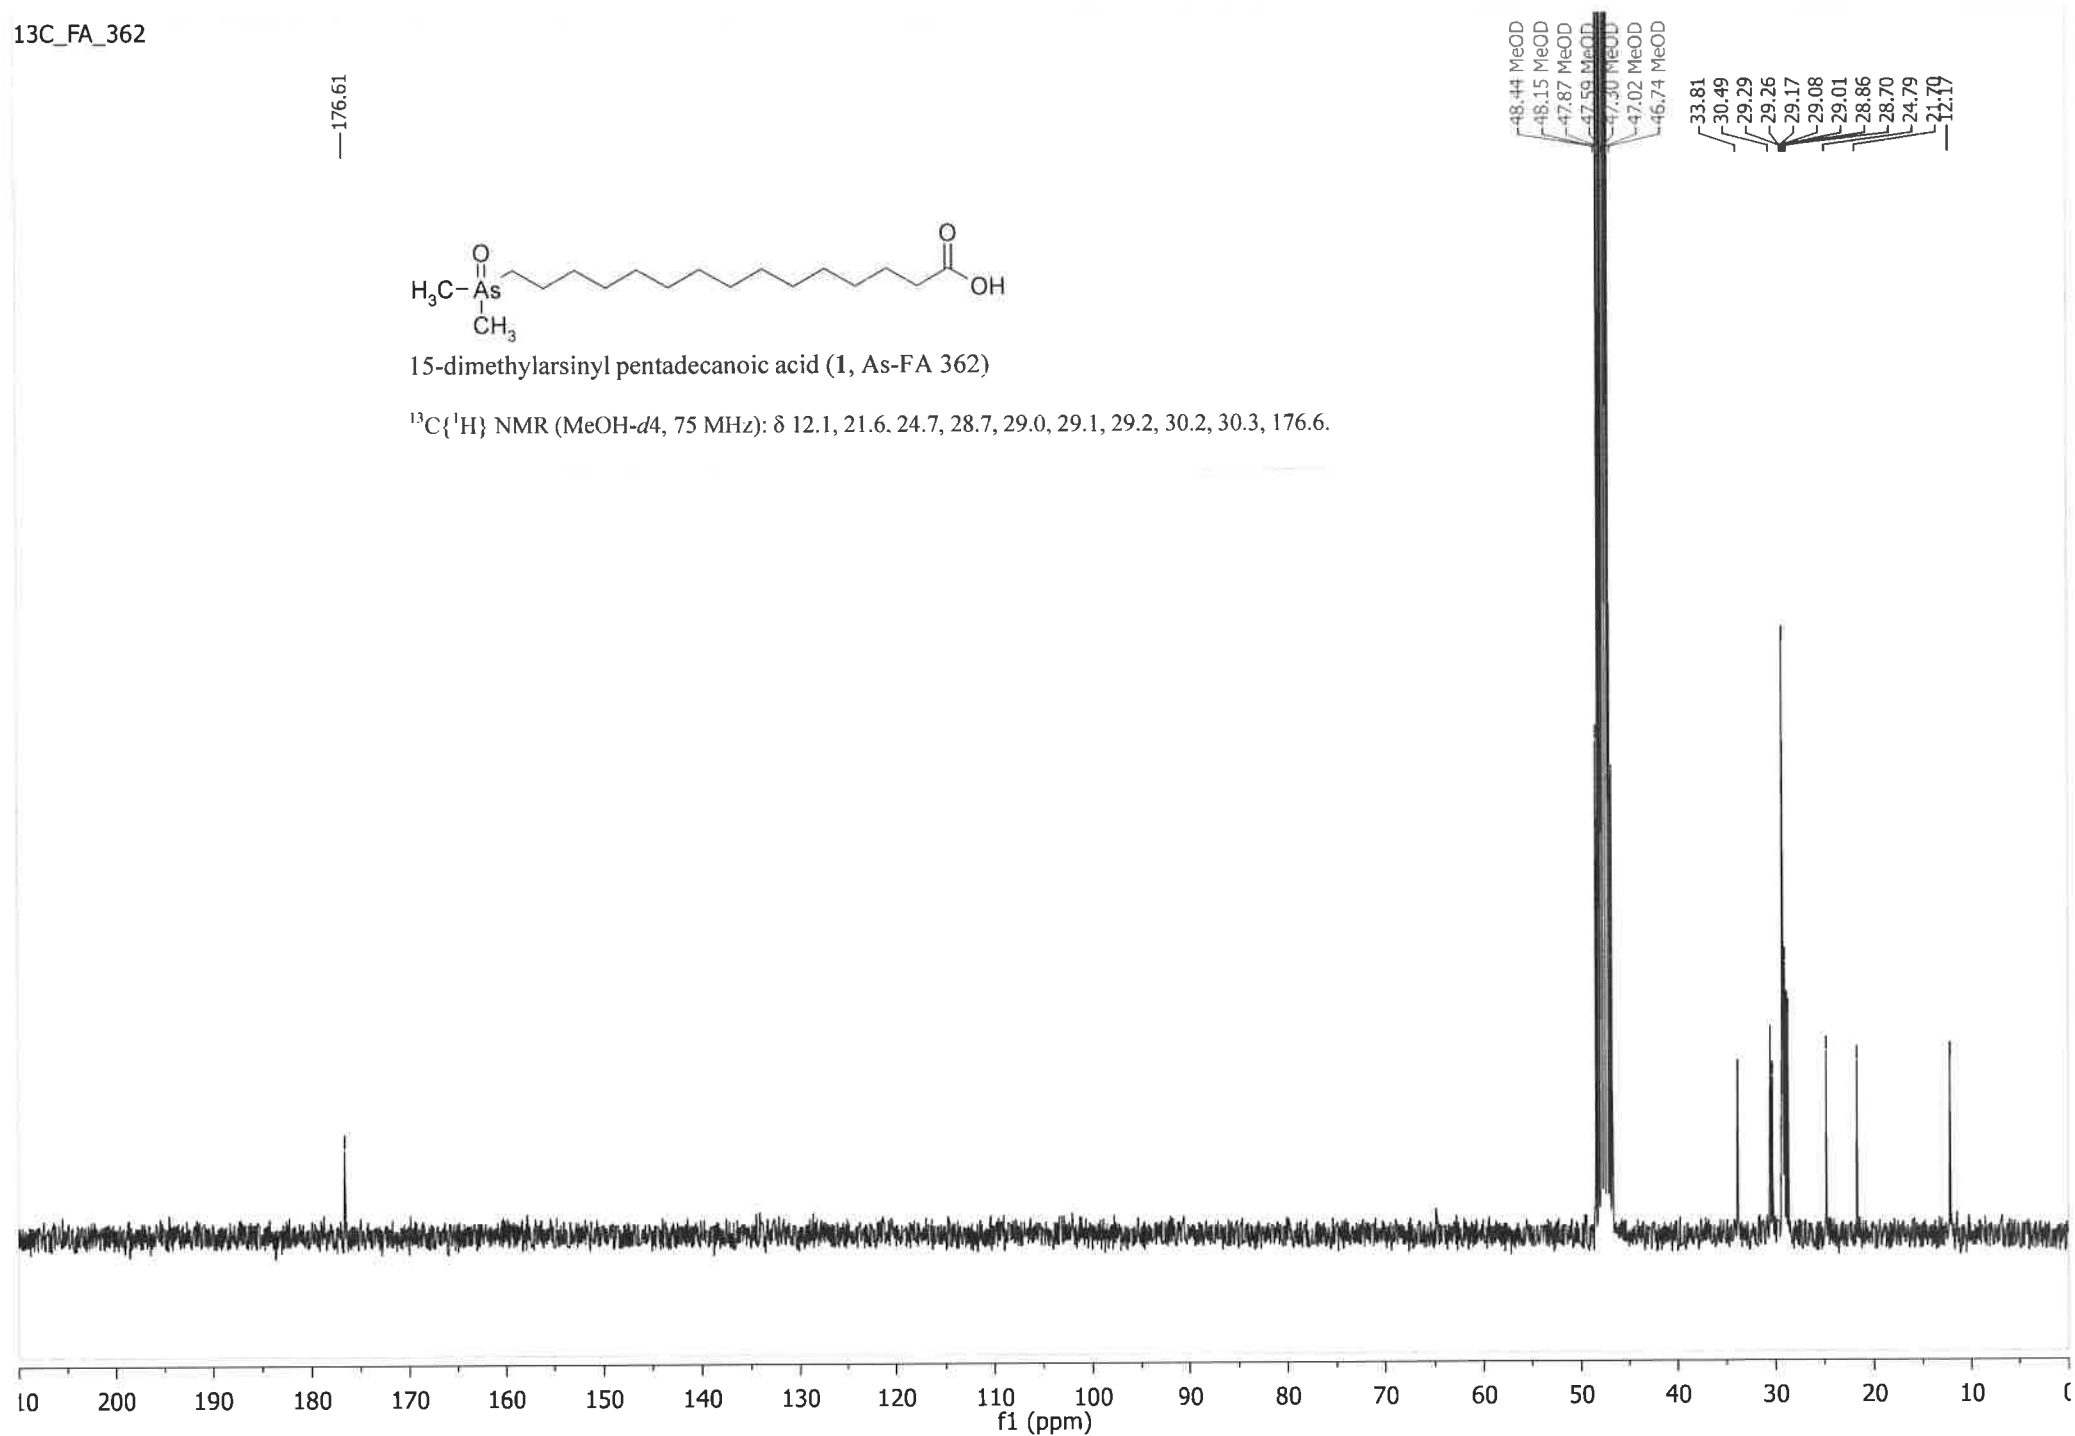

2.28  
 2.26  
 2.24  
 2.23  
 2.20  
 2.18  
 2.15  
 1.75  
 1.68  
 1.58  
 1.45  
 1.28

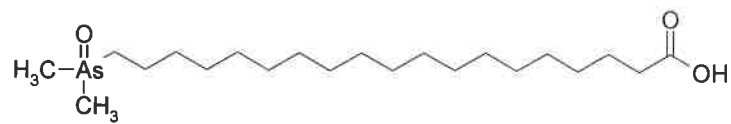

19-Dimethylarsinyl-nonadecanoic acid (2, As-FA 418)

$^1\text{H}$  NMR (MeOH-*d*<sub>4</sub>, 300 MHz):  $\delta$  1.3-1.5 (m, 28H, 14-CH<sub>2</sub>), 1.6 (m, 2H, -CH<sub>2</sub>),  
 1.7 (m, 2H, -CH<sub>2</sub>), 1.75 (s, 6H, -As(CH<sub>3</sub>)<sub>2</sub>), 2.20 (m, 2H, -As-CH<sub>2</sub>),  
 2.28 (t,  $J = 7.5$  Hz, 2H, -CH<sub>2</sub>-COOH).

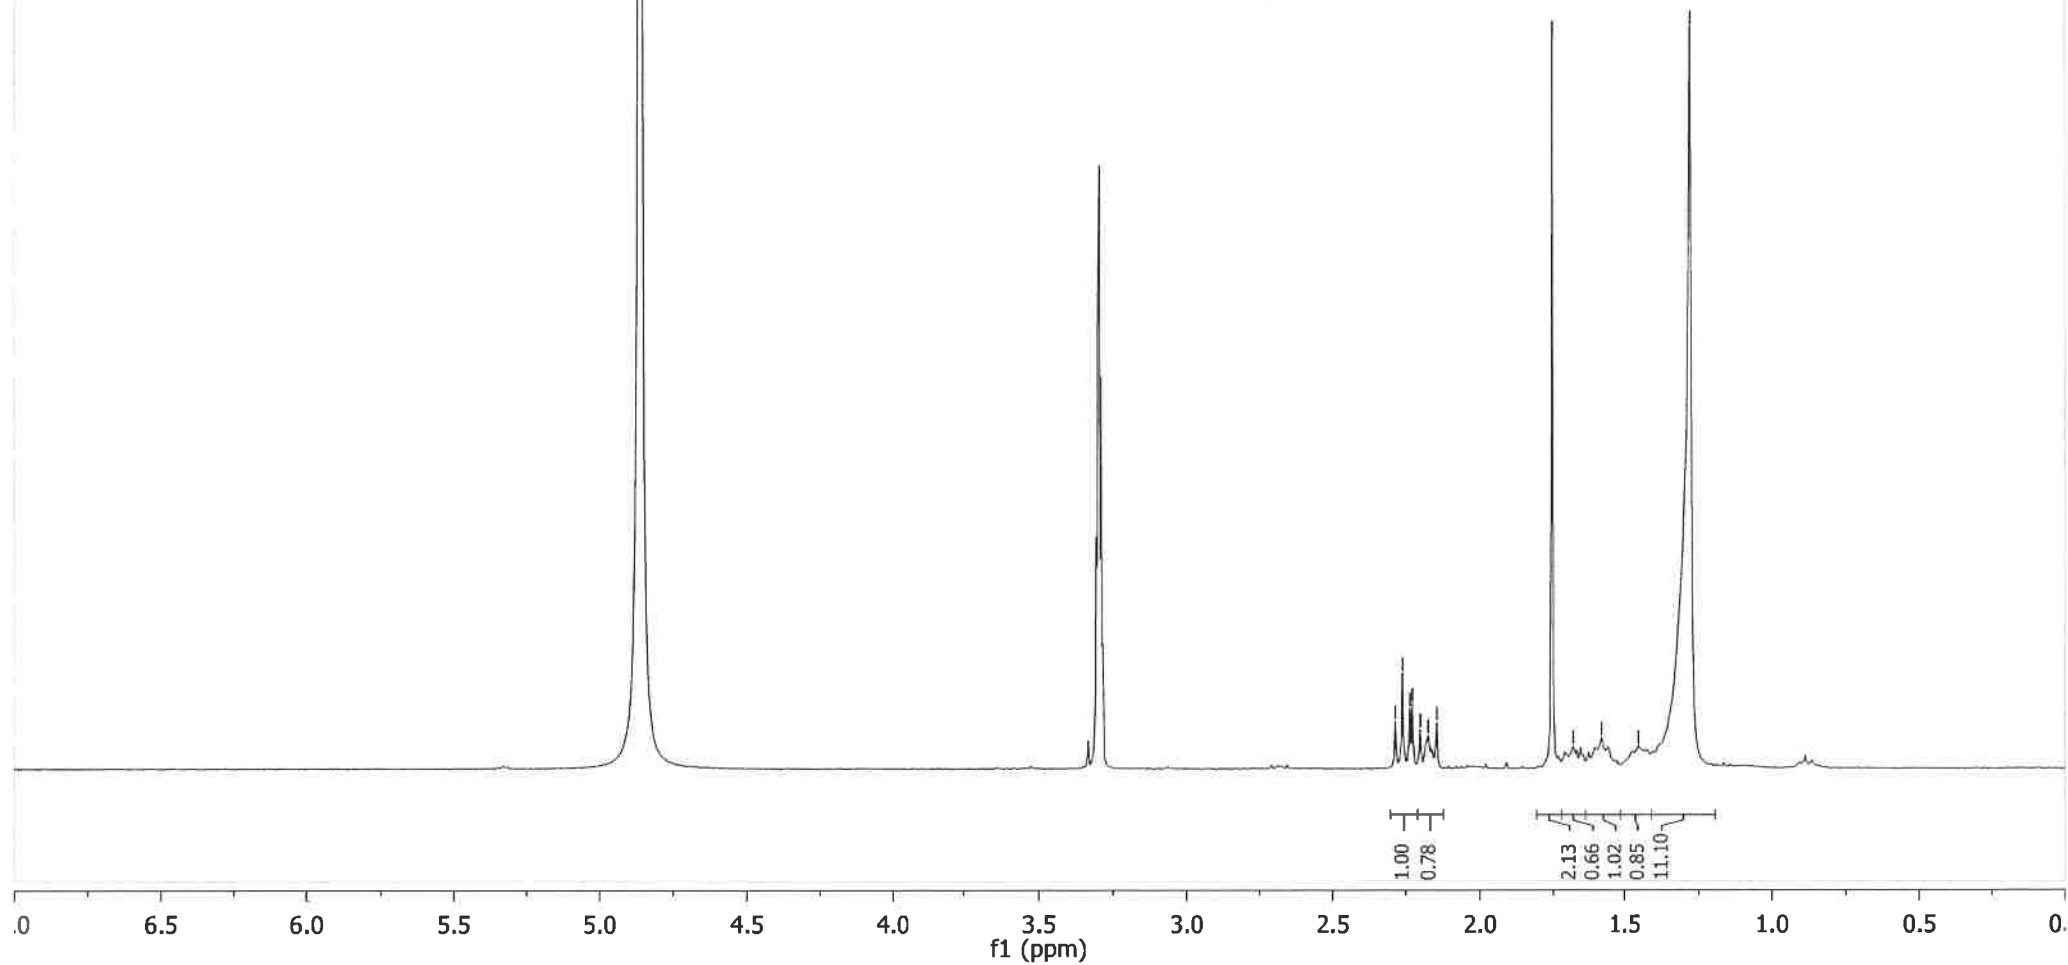

13C\_FA\_418

—176.40

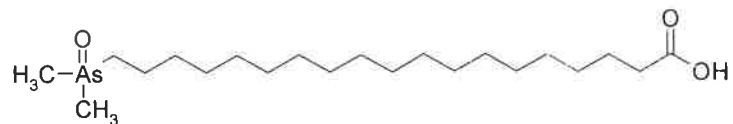

19-Dimethylarsinyl-nonadecanoic acid (**2**, As-FA 418)

$^{13}\text{C}\{^1\text{H}\}$  NMR (MeOH-*d*<sub>4</sub>, 75 MHz):  $\delta$  12.0, 21.6, 24.7, 28.7, 28.8, 29.0, 29.1, 29.2, 30.2, 30.4, 33.6, 176.4.

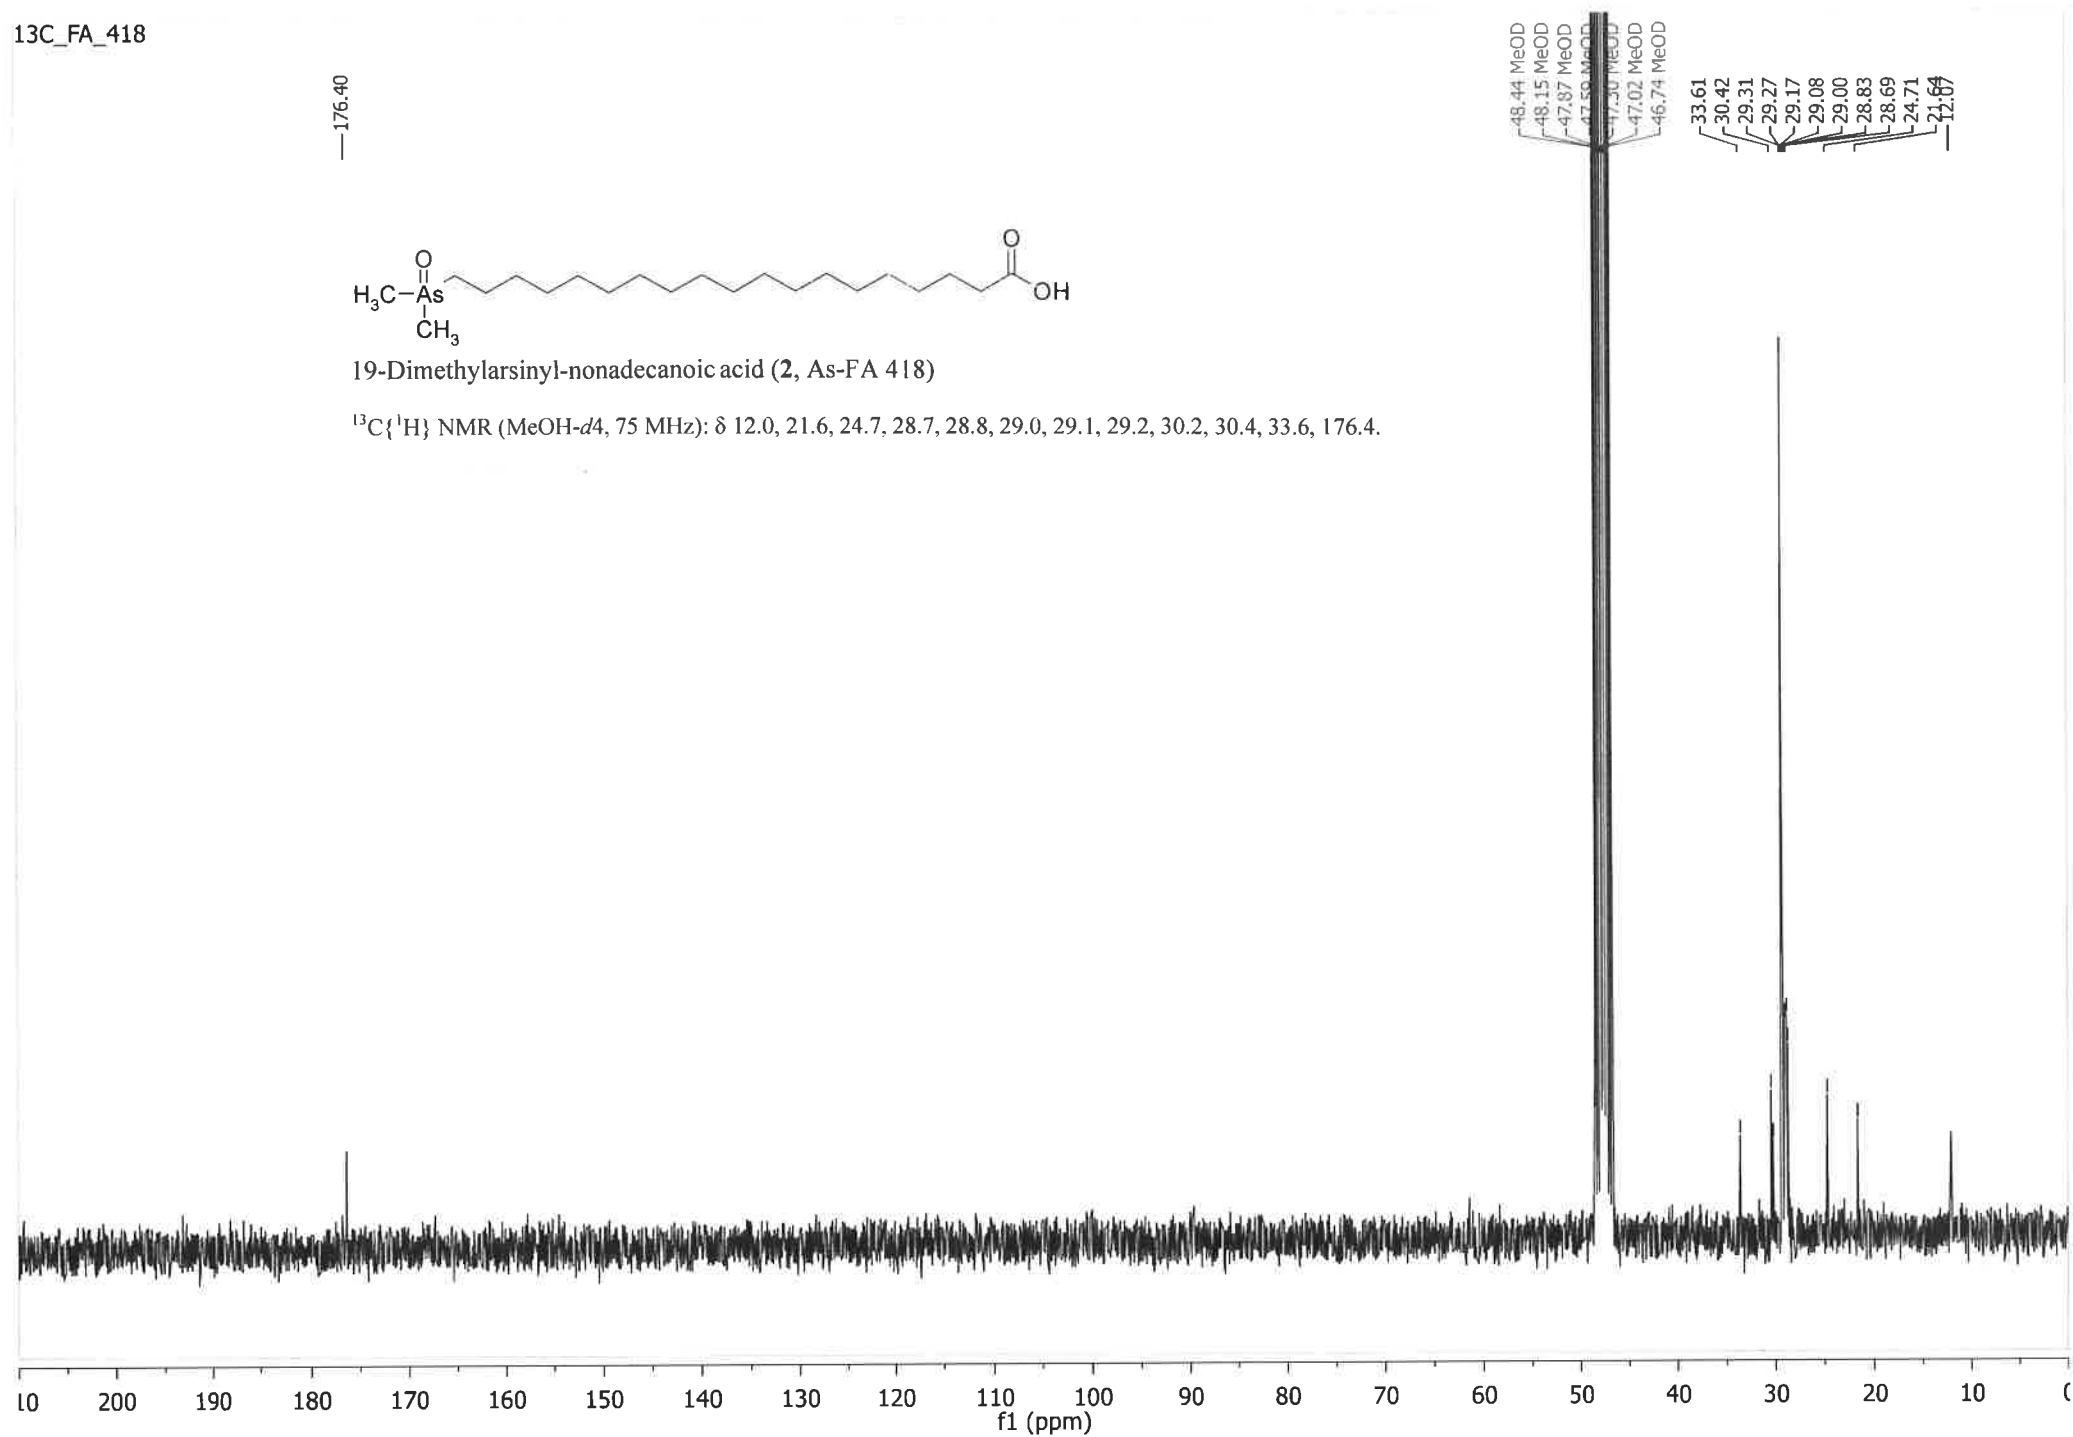

1H\_unsat FA 388

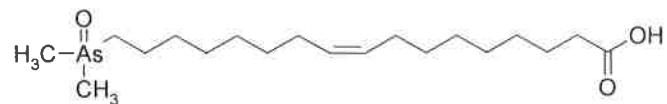

17-dimethylarsinyl-9-heptadecenoic acid (**3**, As-FA 388)

$^1\text{H NMR}$  (MeOH- $d_4$ , 300 MHz): 1.3-1.5 (m, 16H, 8-CH<sub>2</sub>), 1.6 (m, 4H, 2-CH<sub>2</sub>), 1.7 (s, 6H, -As(CH<sub>3</sub>)<sub>2</sub>), 2.0 (m, 4H, -CH<sub>2</sub>-CH=CH-CH<sub>2</sub>-), 2.1 (m, 2H, -As-CH<sub>2</sub>), 2.3 (t,  $J = 7.5$  Hz, 2H, -CH<sub>2</sub>-COOH), 5.4 (m, 2H, -CH=CH-).

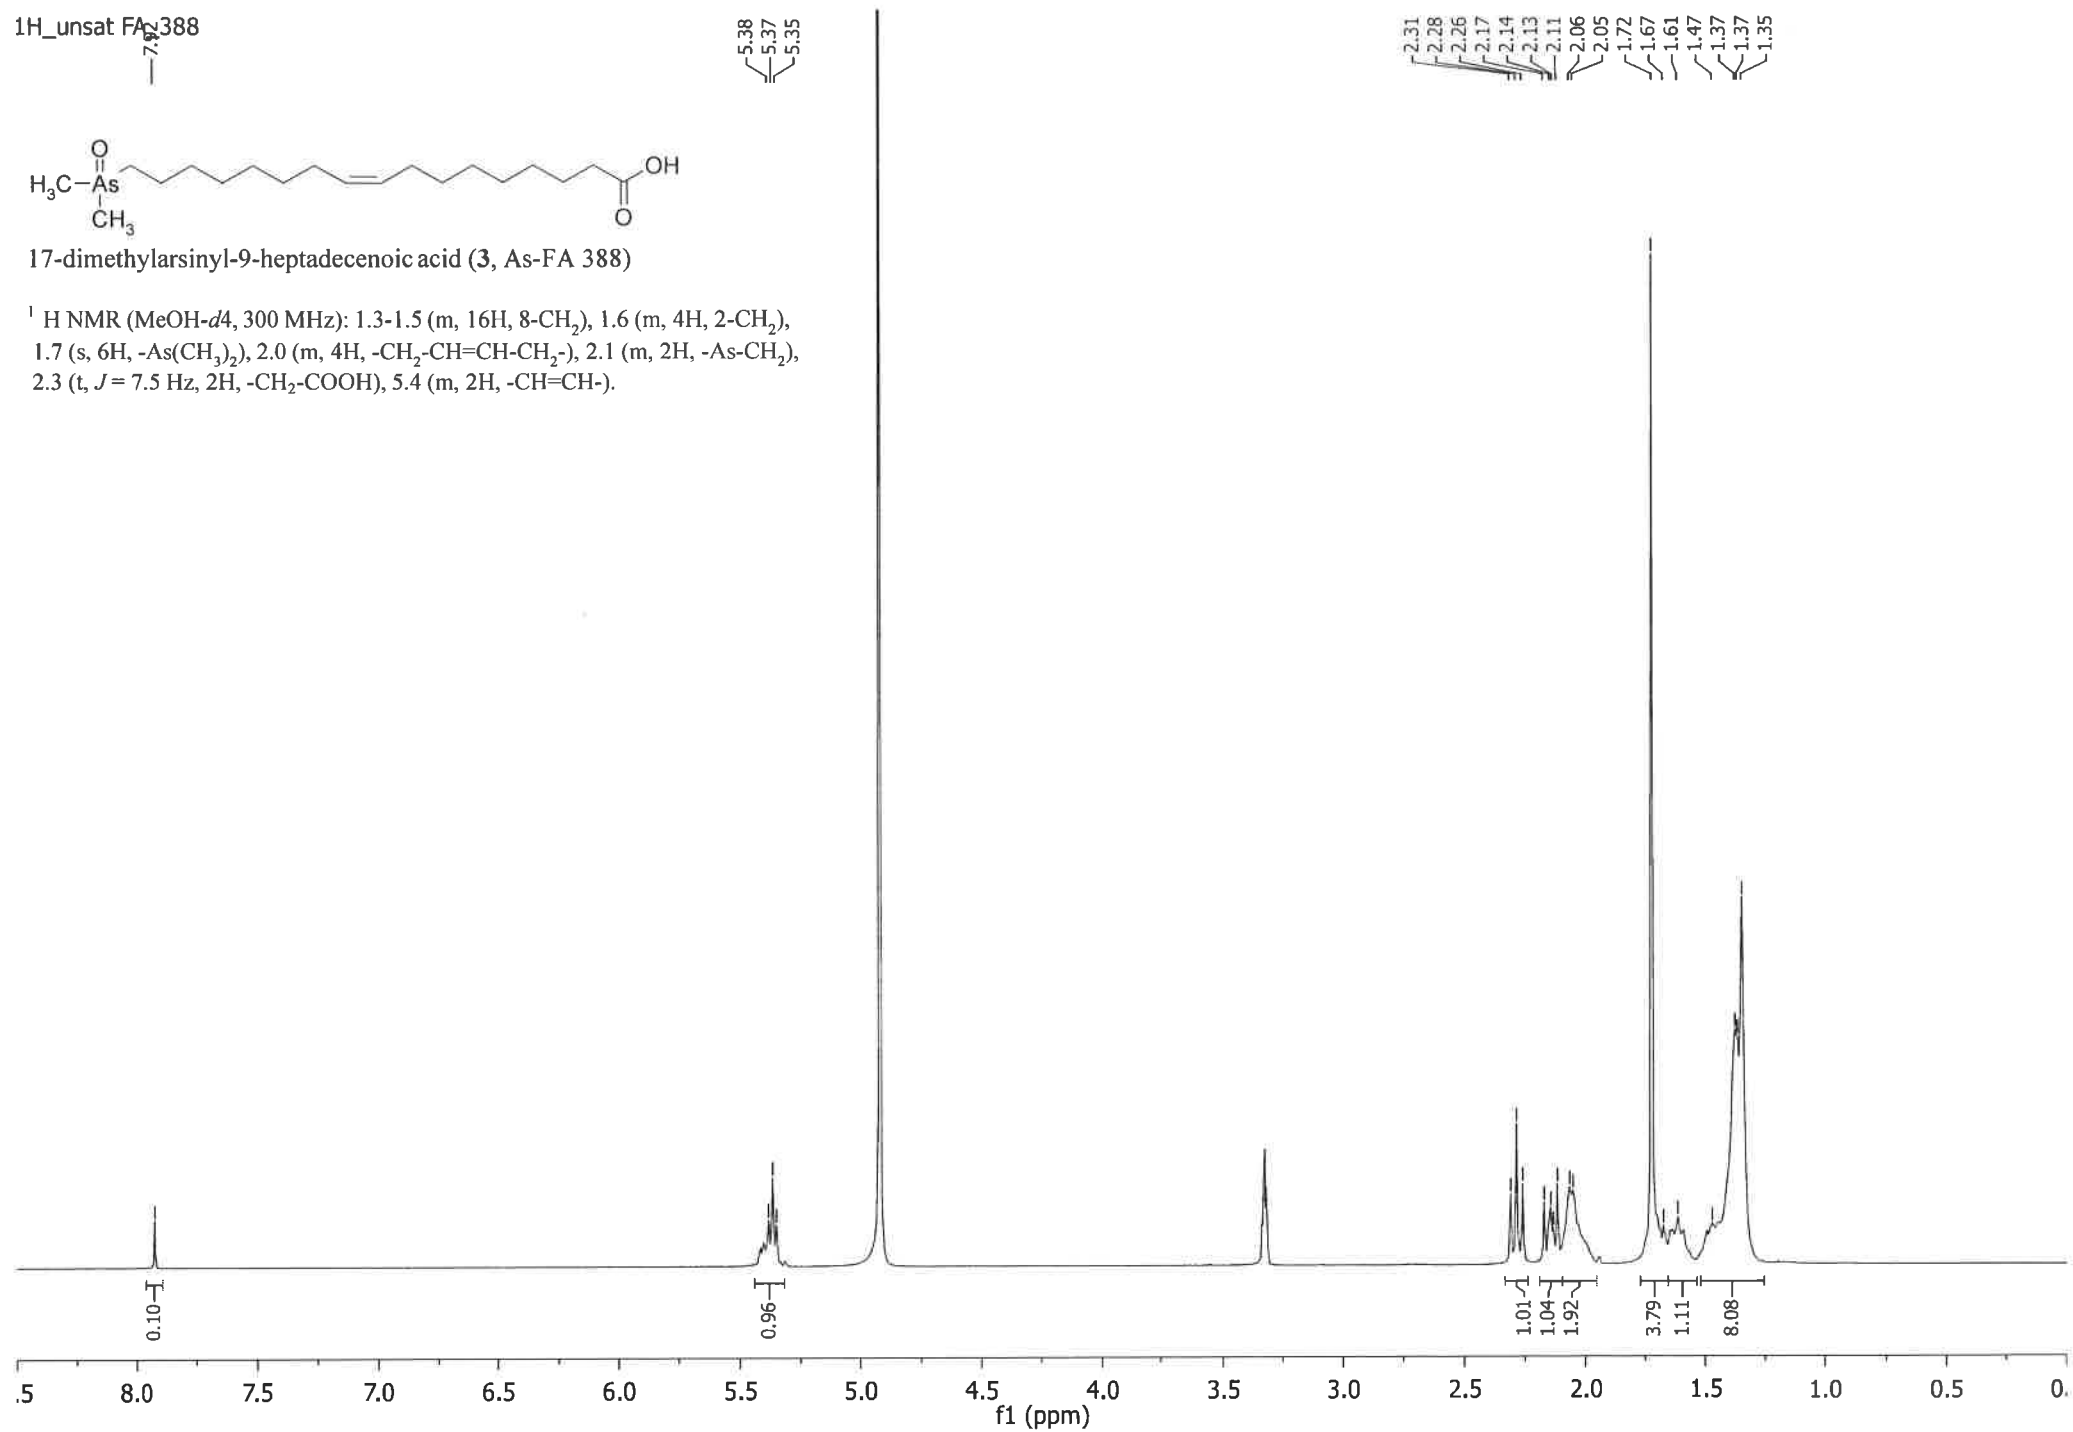

13C\_unsat FA\_388

176.58

129.47  
129.40

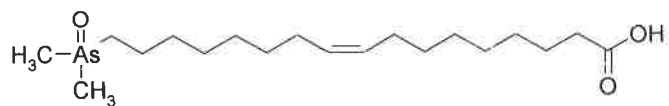

17-dimethylarsinyl-9-heptadecenoic acid (**3**, As-FA 388)

$^{13}\text{C}\{^1\text{H}\}$  NMR (MeOH-*d*<sub>4</sub>, 75 MHz):  $\delta$  12.1, 21.7, 24.7, 26.6, 28.1, 28.5, 28.6, 28.7, 28.8, 29.2, 29.3, 30.2, 32.1, 33.8, 129.4, 130.1, 176.6.

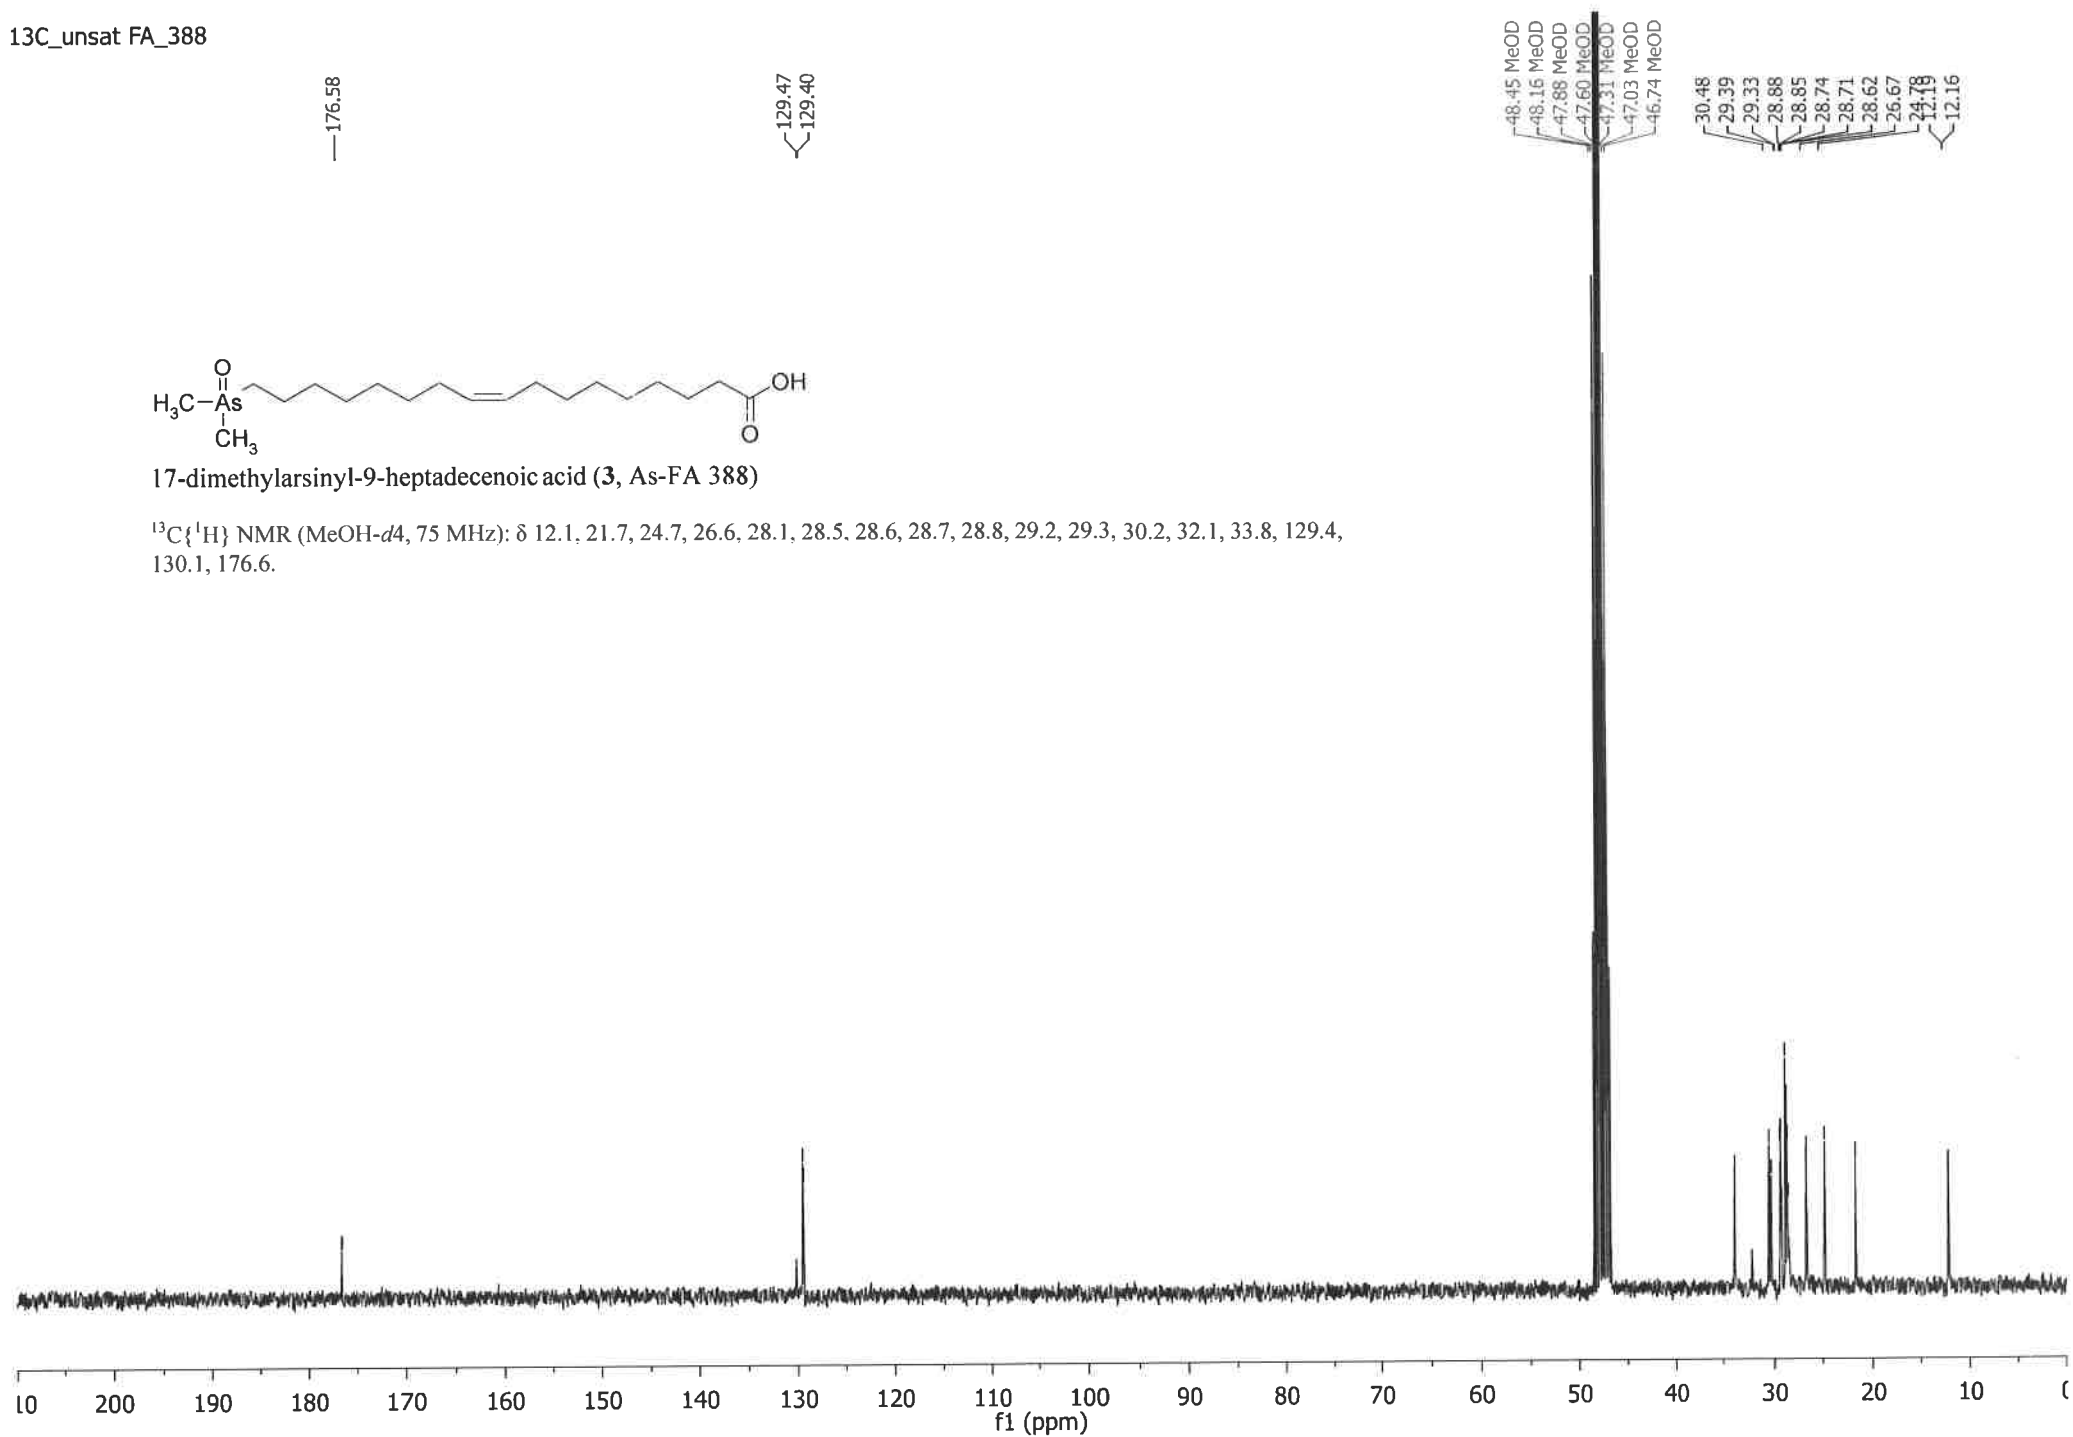

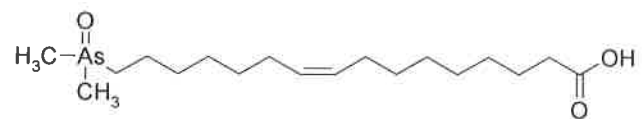

16-dimethylarsinyl-9-hexadecenoic acid (4, As-FA 374)

$^1\text{H}$  NMR (MeOH- $d_4$ , 300 MHz): 1.30-1.50 (m, 14H, 7- $\text{CH}_2$ ),  
 1.6 (m, 4H, 2- $\text{CH}_2$ ), 1.7 (s, 6H, -As( $\text{CH}_3$ ) $_2$ ), 2.0 (m, 4H, - $\text{CH}_2$ -CH=CH- $\text{CH}_2$ -),  
 2.1 (m, 2H, -As- $\text{CH}_2$ ), 2.3 (t,  $J = 7.5$  Hz, 2H, - $\text{CH}_2$ -COOH), 5.41 (m, 2H, -CH=CH-).

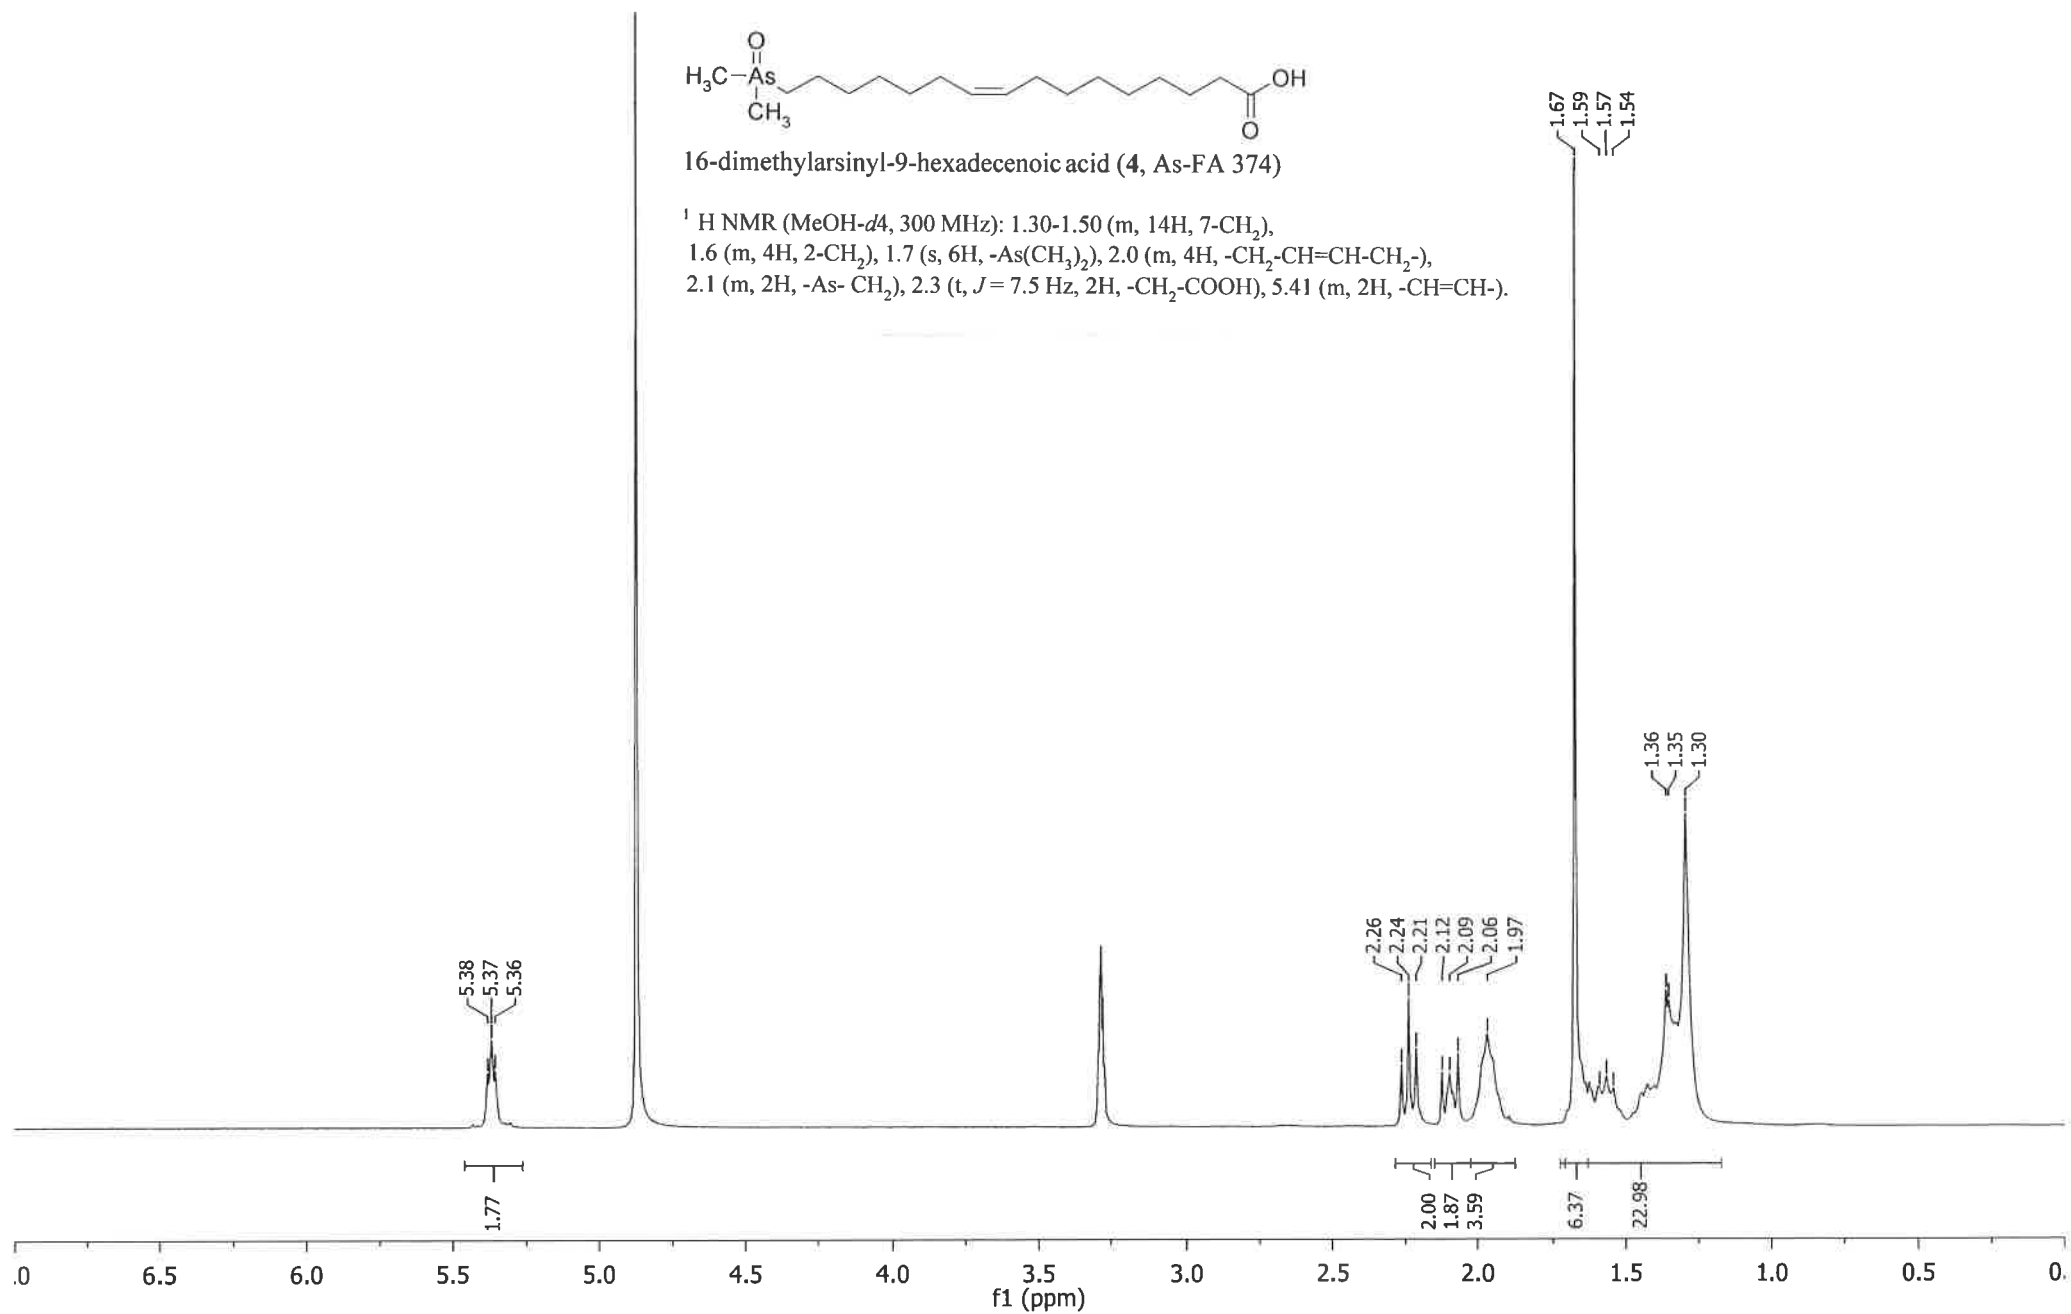



13C\_ unsat FA\_374

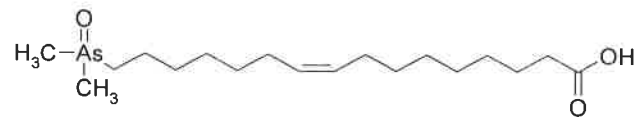

16-dimethylarsinyl-9-hexadecenoic acid (4, As-FA 374)

$^{13}\text{C}\{^1\text{H}\}$  NMR (MeOH-*d*4, 75 MHz):  $\delta$  12.1, 21.6, 24.7, 28.1, 28.5, 28.8, 29.0, 29.2, 30.3, 32.1, 33.8, 129.9, 130.2, 176.6.

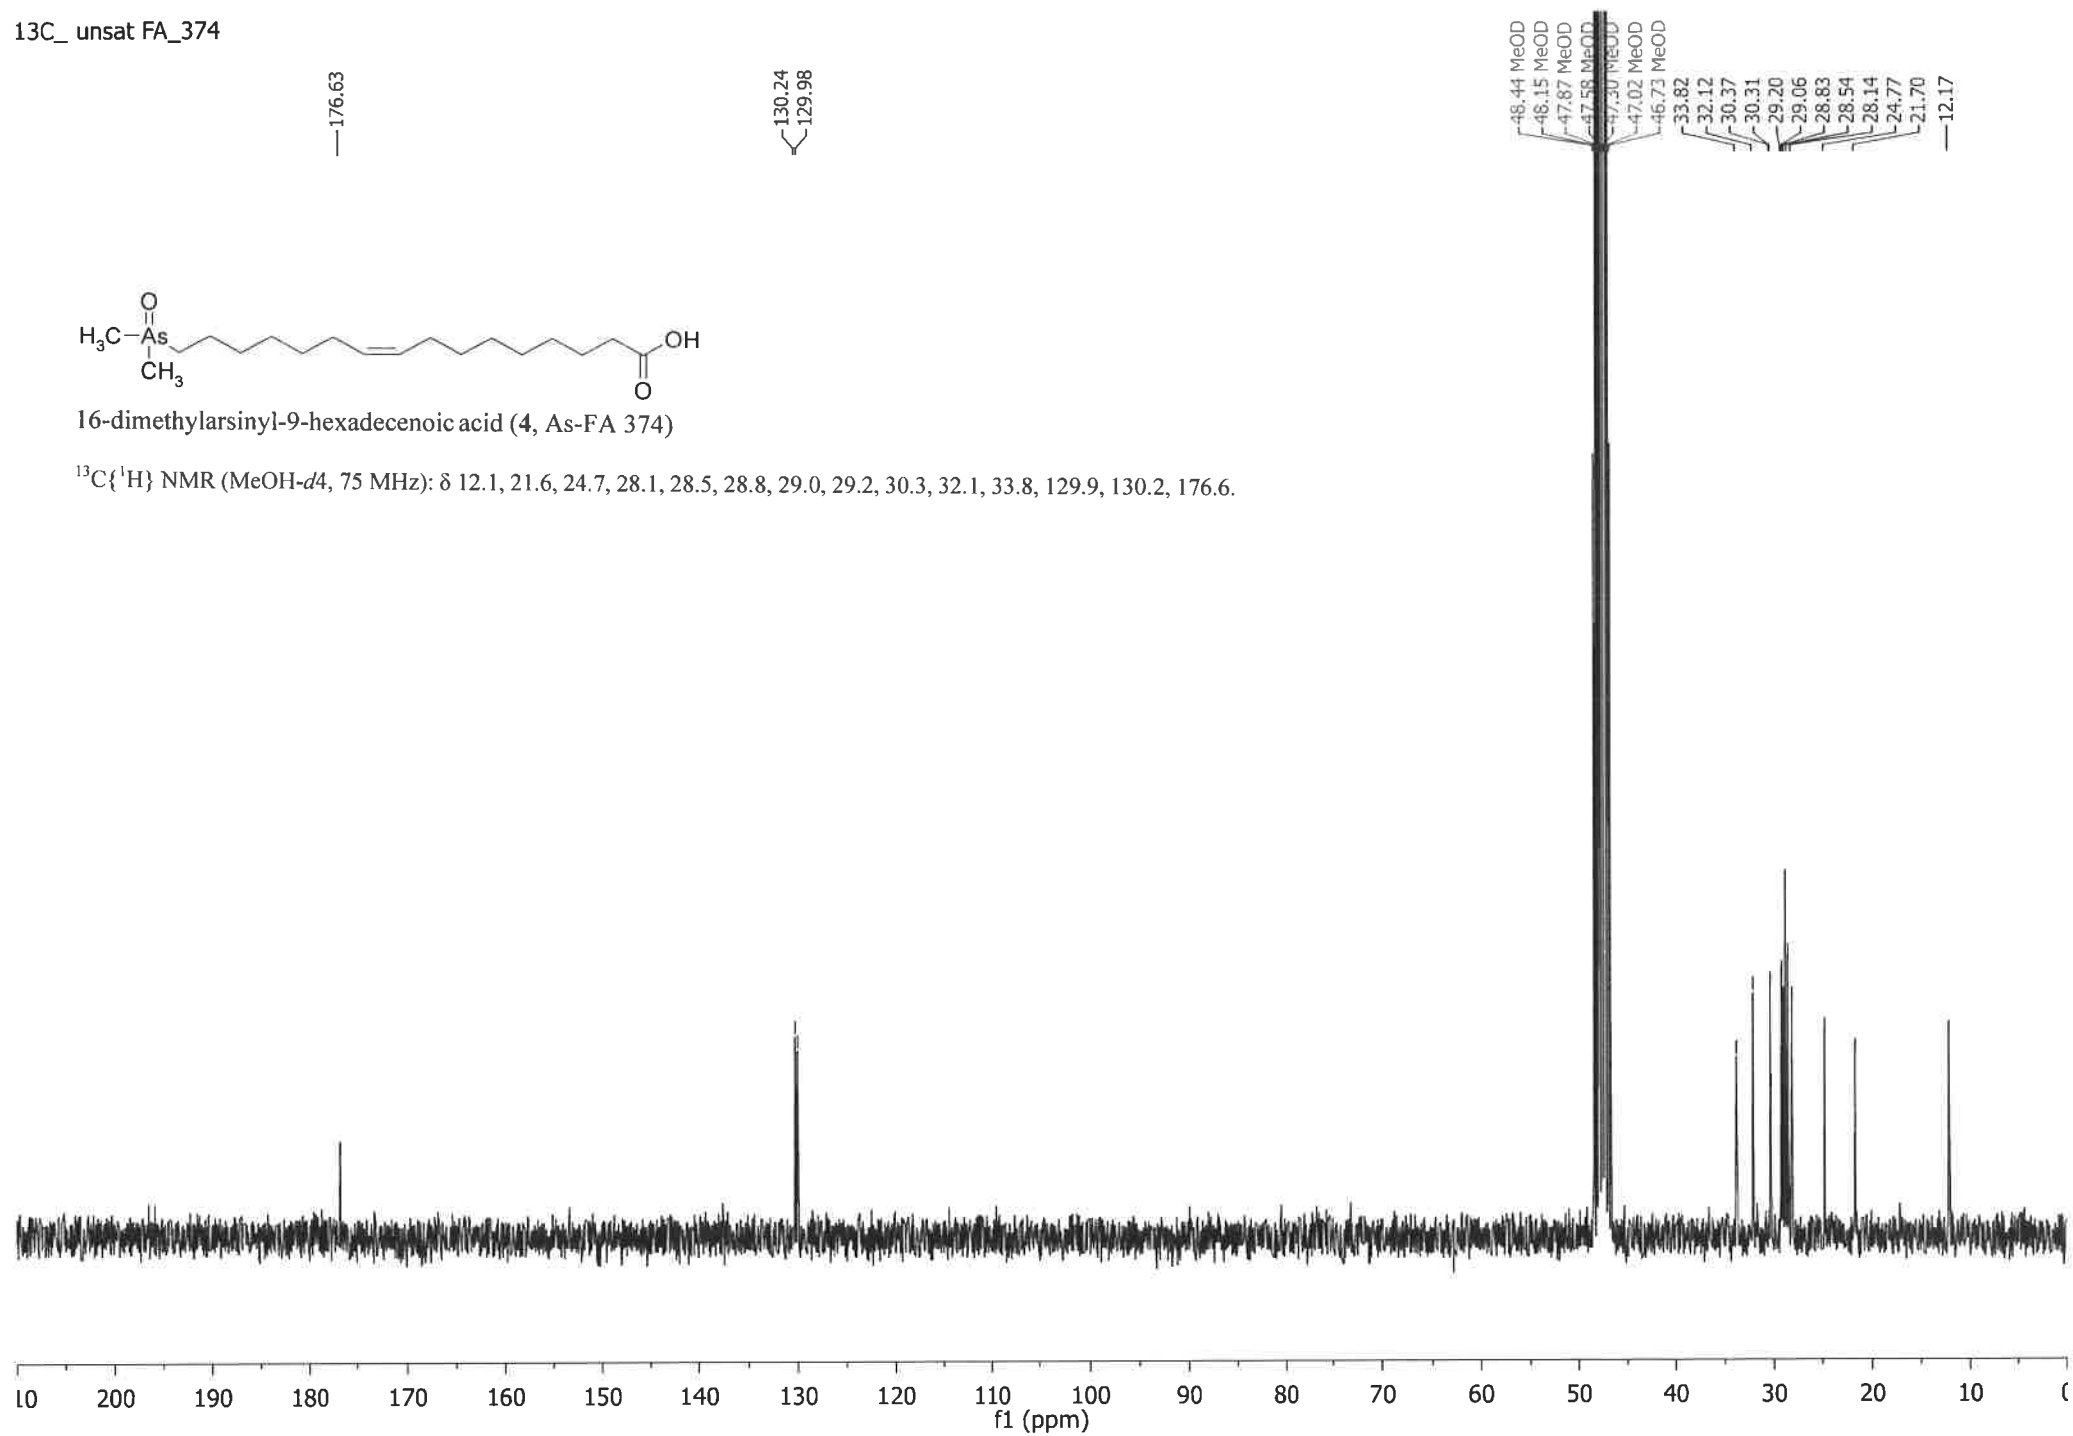

1H\_HC\_332

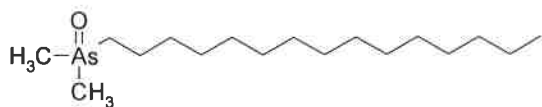

1-dimethylarsinyl-pentadecane (5, As-HC 332)

<sup>1</sup>H NMR (MeOH-*d*<sub>4</sub>, 300 MHz): δ 0.9 (t, *J* = 6.9 Hz, 3H, -CH<sub>3</sub>),  
1.2-1.5 (m, 24H, 12-CH<sub>2</sub>), 1.6 (m, 2H, -CH<sub>2</sub>), 1.7 (s, 6H, -As(CH<sub>3</sub>)<sub>2</sub>),  
2.1 (m, 2H, -As-CH<sub>2</sub>).

2.11  
2.08  
2.05  
— 1.66  
— 1.43  
— 1.26  
0.90  
0.88  
0.85

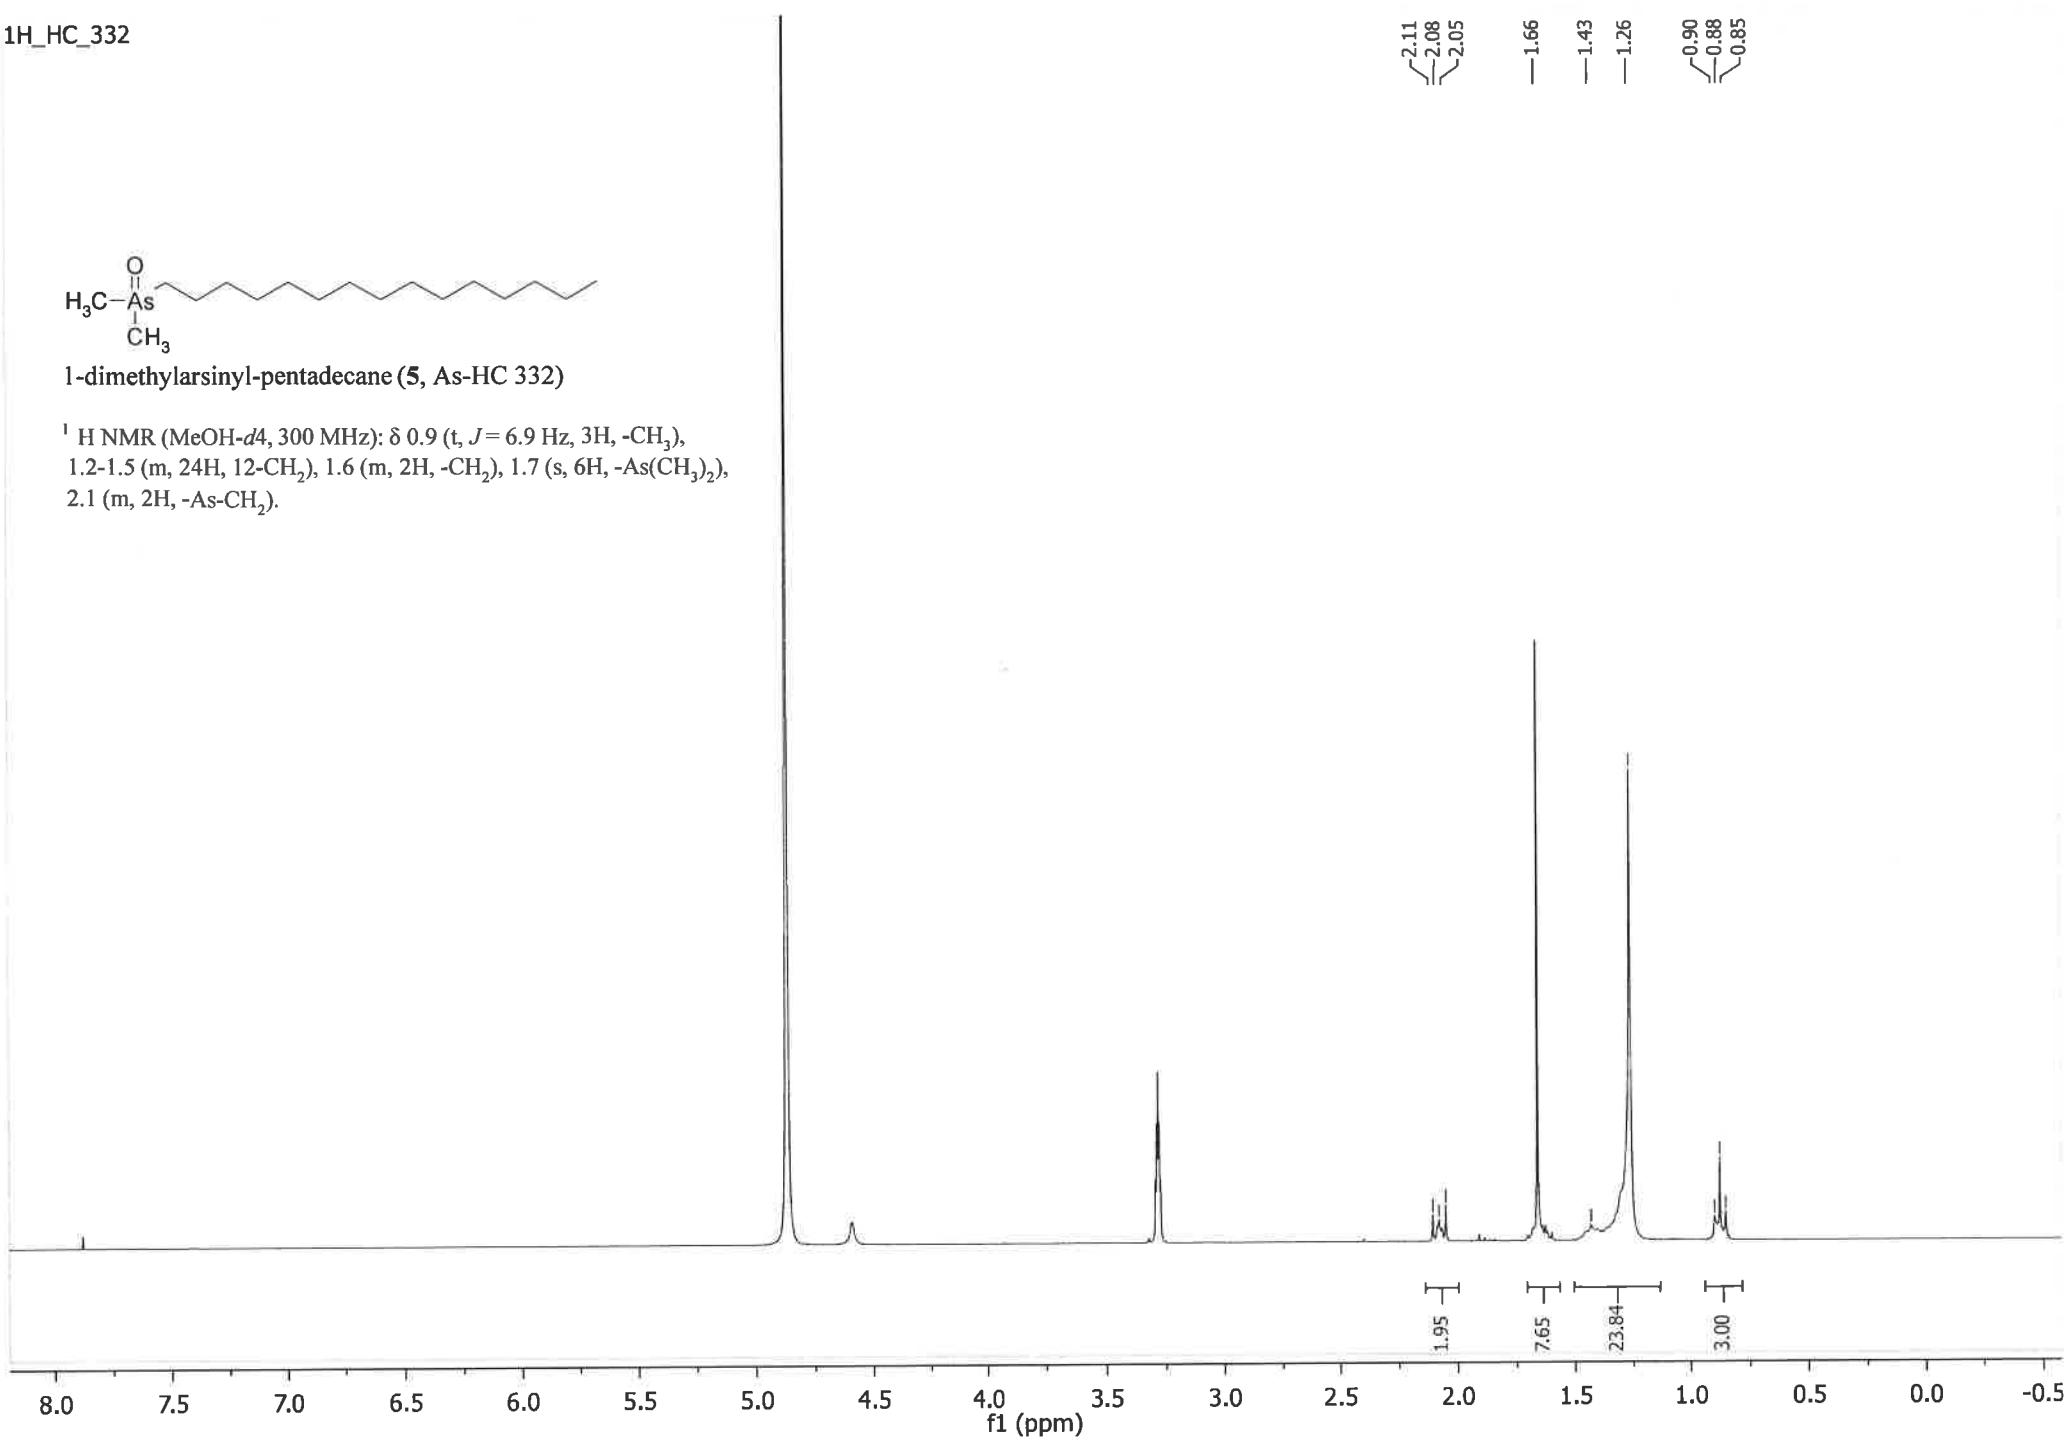

1.95  
7.65  
23.84  
3.00

13C\_HC\_332

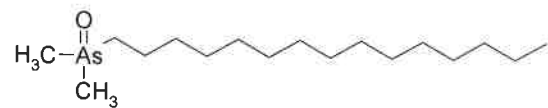

1-dimethylarsinyl-pentadecane (**5**, As-HC 332)

$^{13}\text{C}\{^1\text{H}\}$  NMR (MeOH-*d*<sub>4</sub>, 75 MHz):  $\delta$  12.2, 13.0, 21.7, 22.3, 28.7, 29.1, 29.3, 29.4, 31.6.

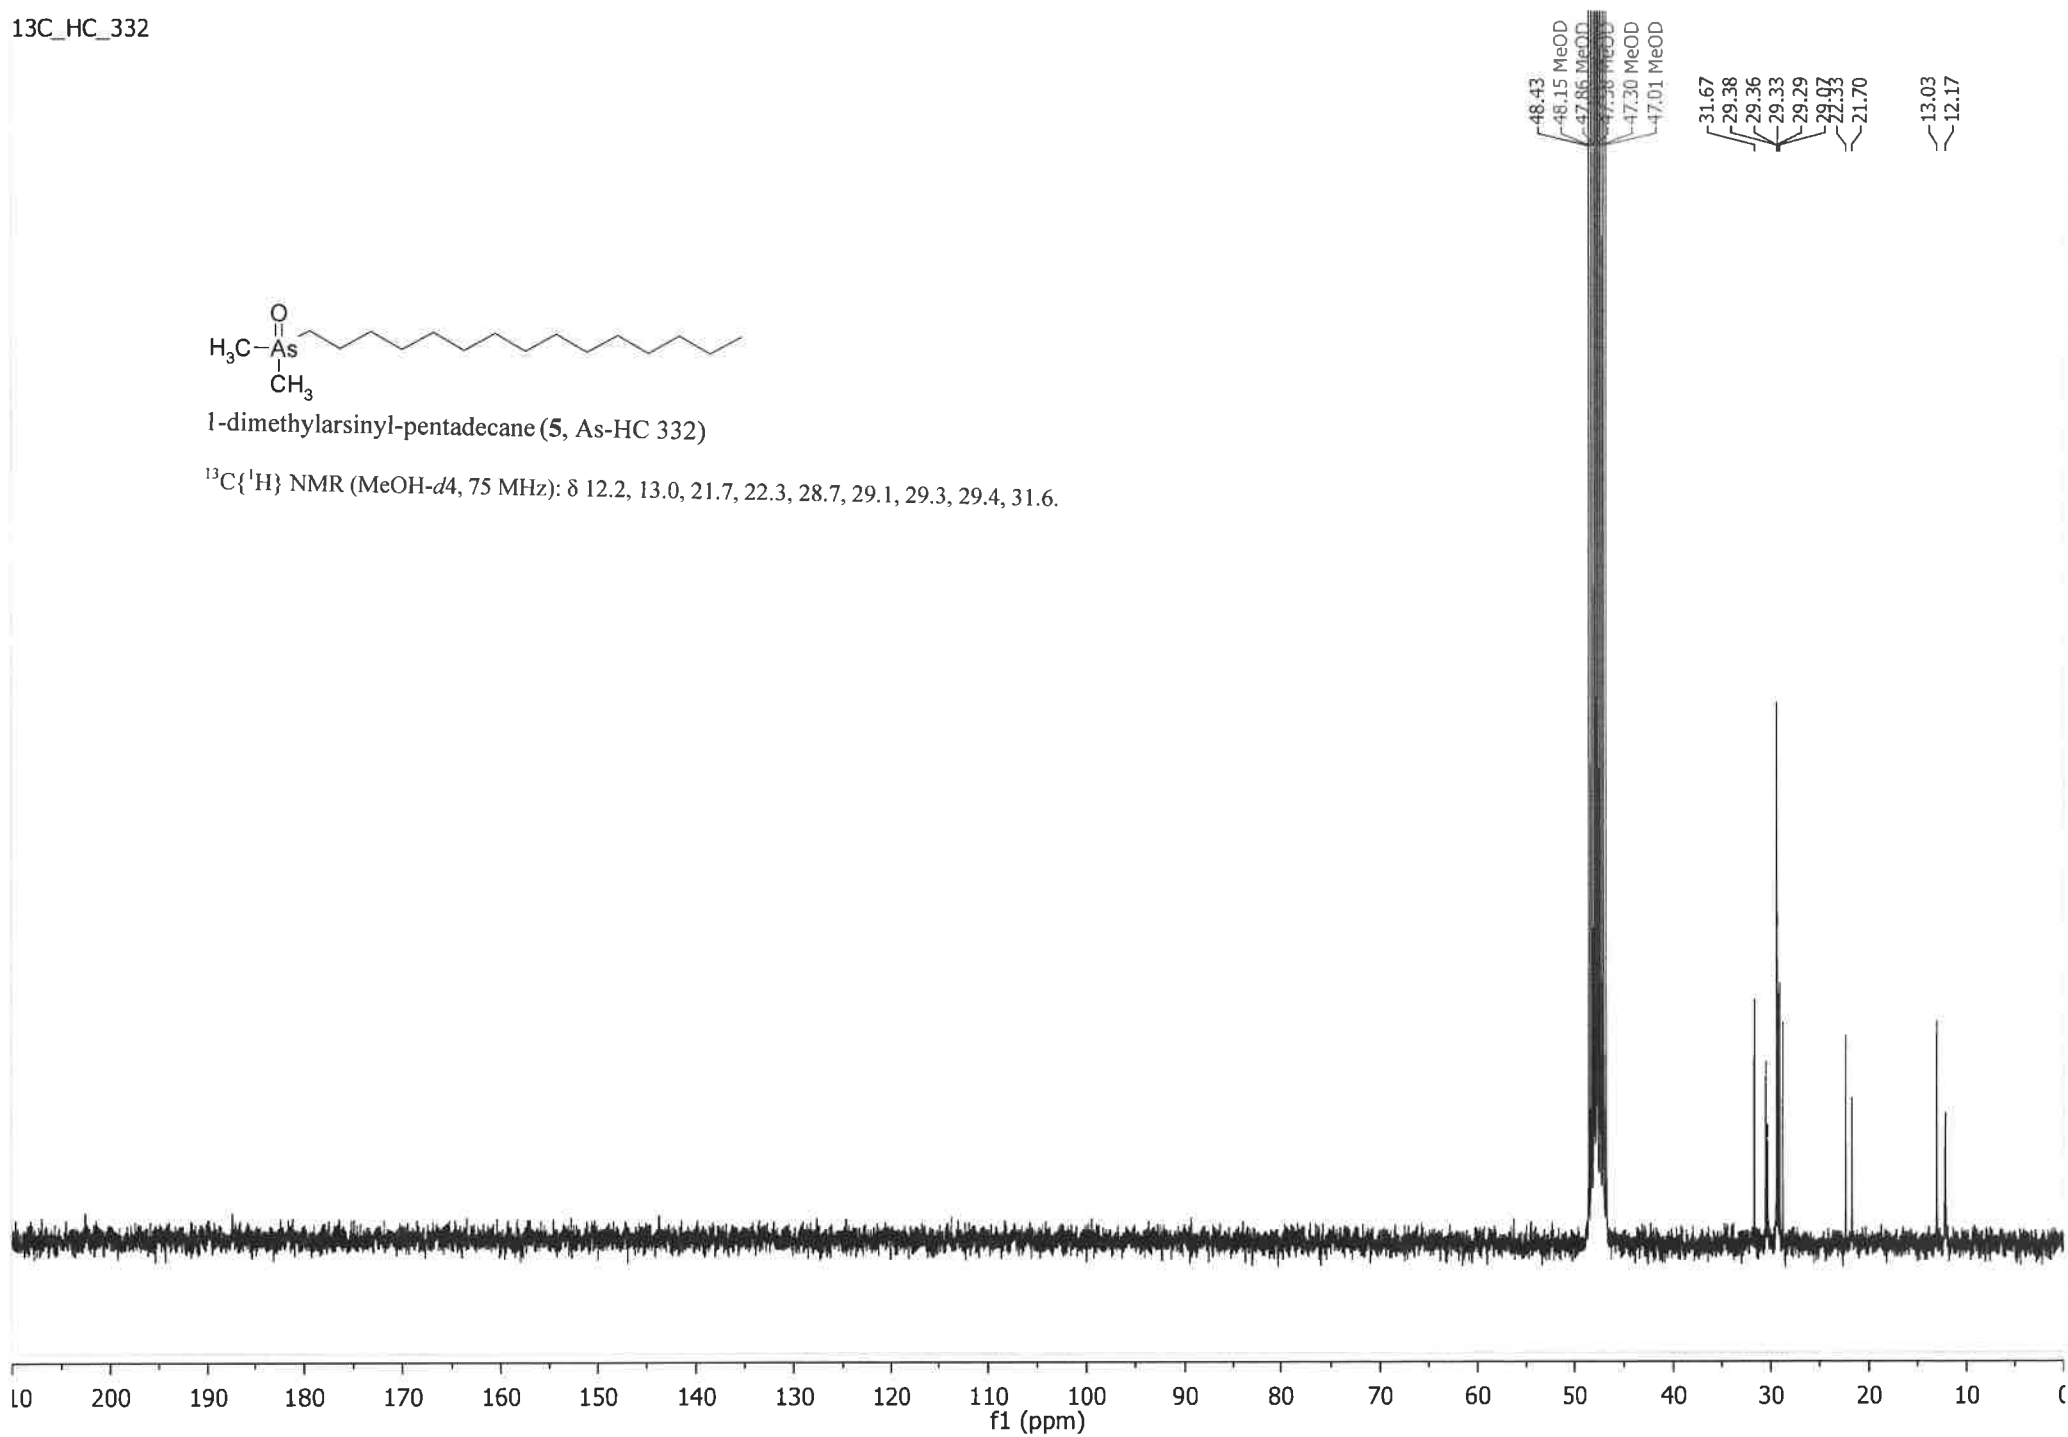

1H\_HC\_360

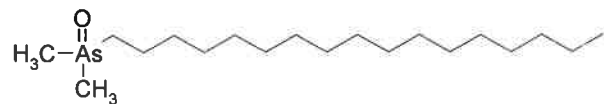

1-dimethylarsinyl-heptadecane (6, As-HC 360)

<sup>1</sup>H NMR (MeOH-*d*<sub>4</sub>, 300 MHz): δ 0.91 (t, *J* = 6.9 Hz, 3H, -CH<sub>3</sub>),  
1.2-1.5 (m, 28H, 14-CH<sub>2</sub>), 1.6 (m, 2H, -CH<sub>2</sub>), 1.7 (s, 6H, -As(CH<sub>3</sub>)<sub>2</sub>),  
2.1 (m, 2H, -As-CH<sub>2</sub>).

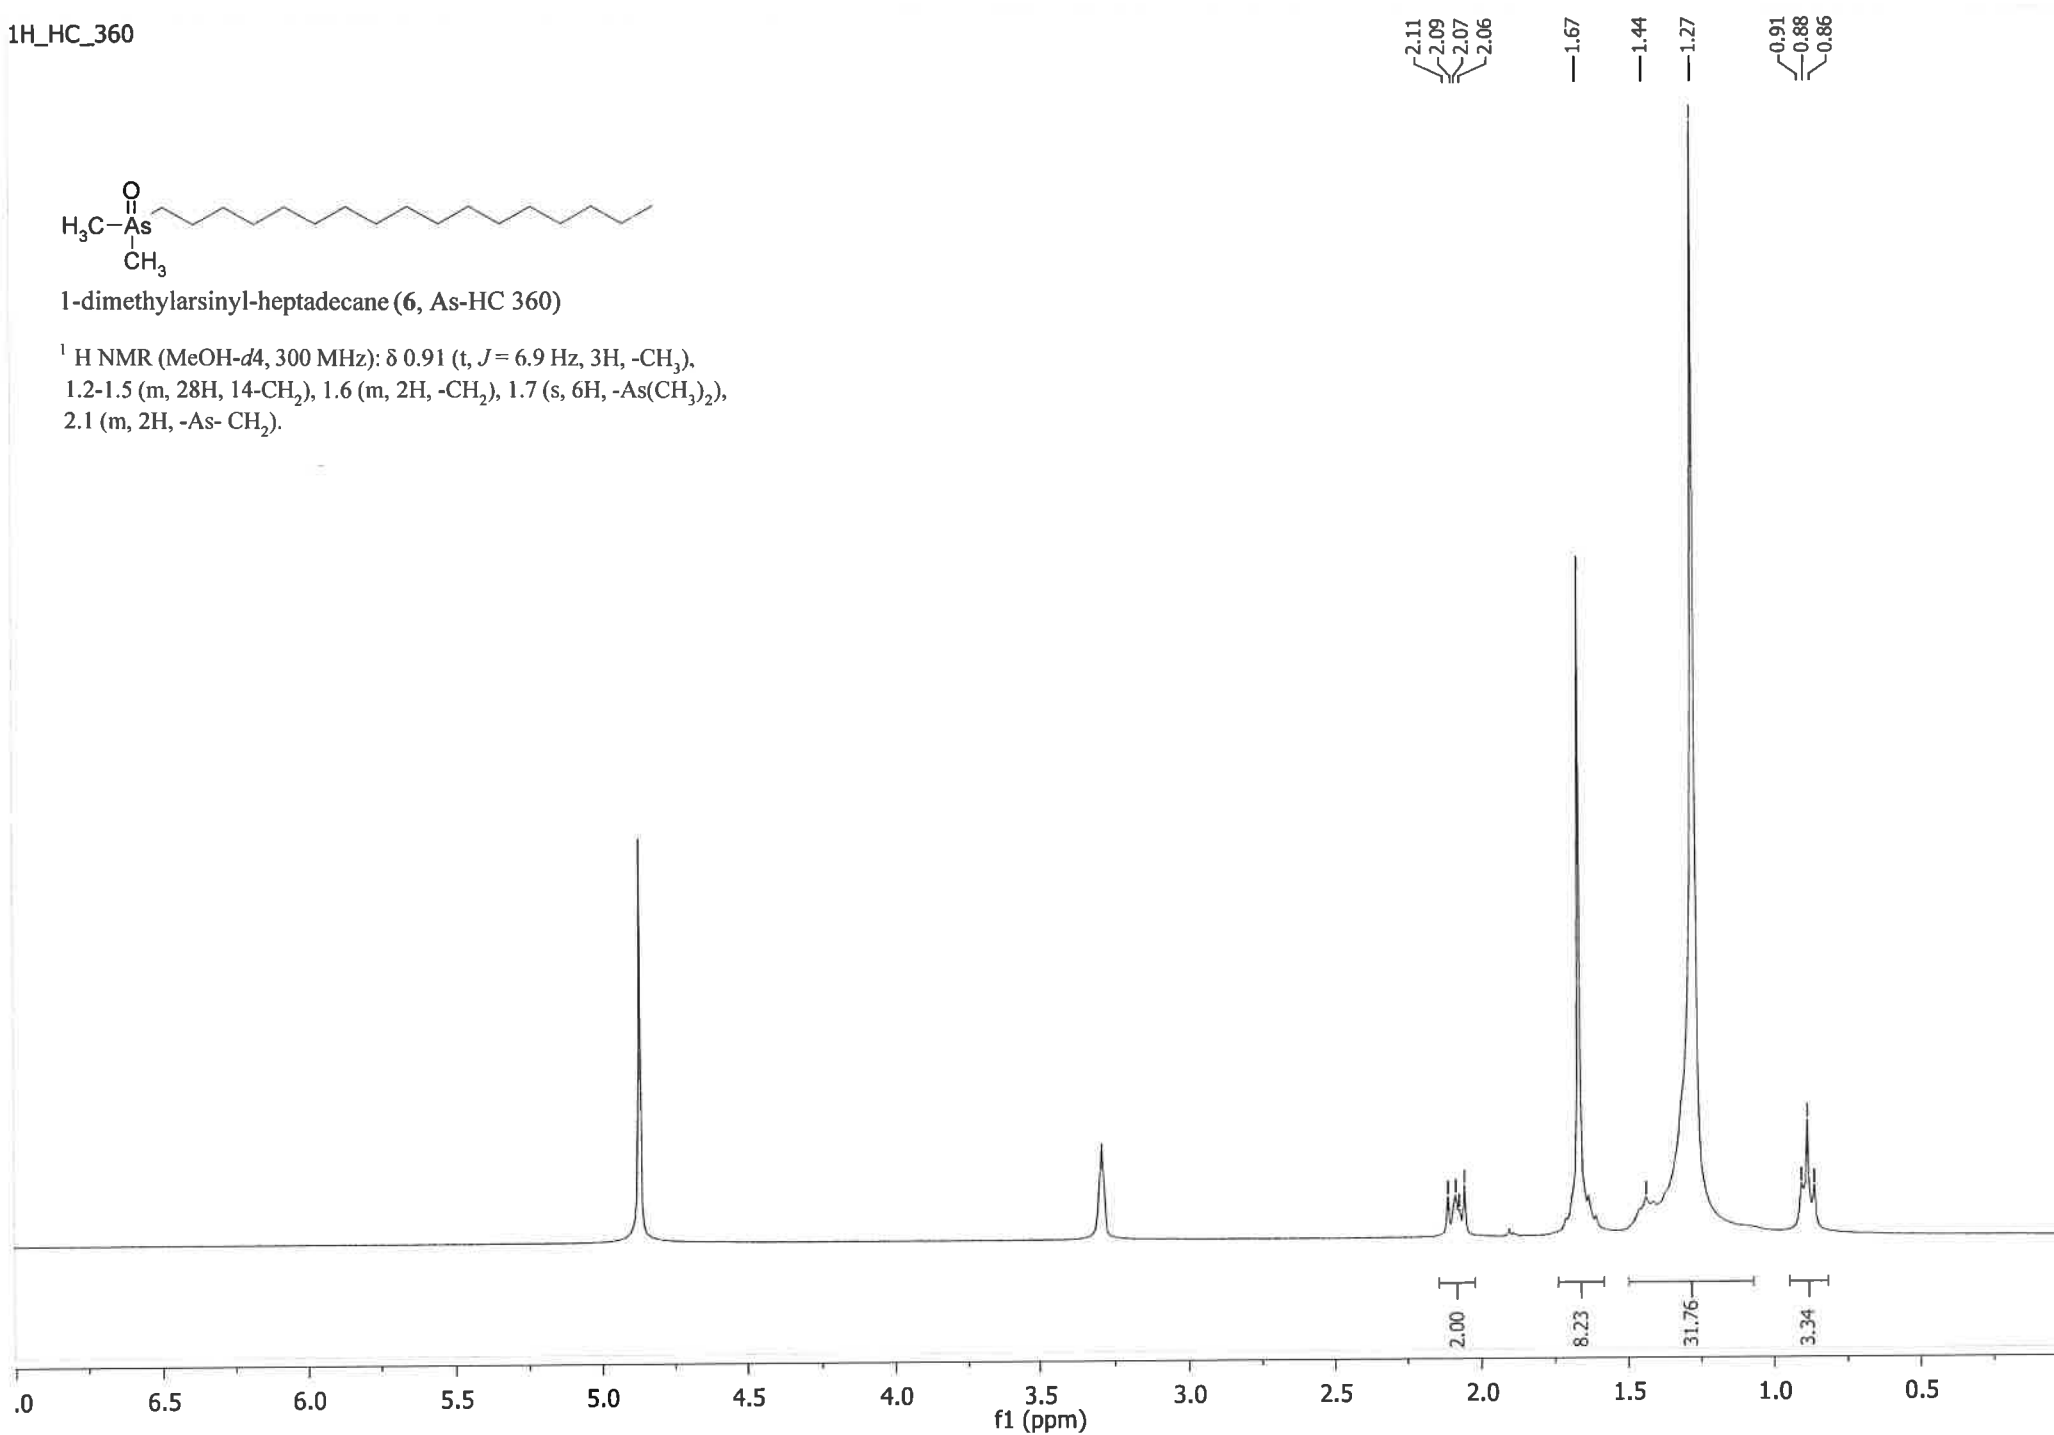

<sup>13</sup>C\_HC\_360

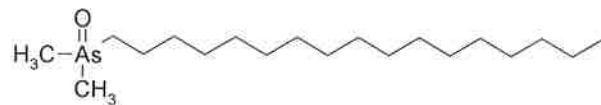

1-dimethylarsinyl-heptadecane (6, As-HC 360)

<sup>13</sup>C{<sup>1</sup>H} NMR (MeOH-*d*<sub>4</sub>, 75 MHz): δ 12.2, 13.0, 21.7, 22.3, 28.7, 29.0, 29.1, 29.3, 30.3, 30.5, 31.6.

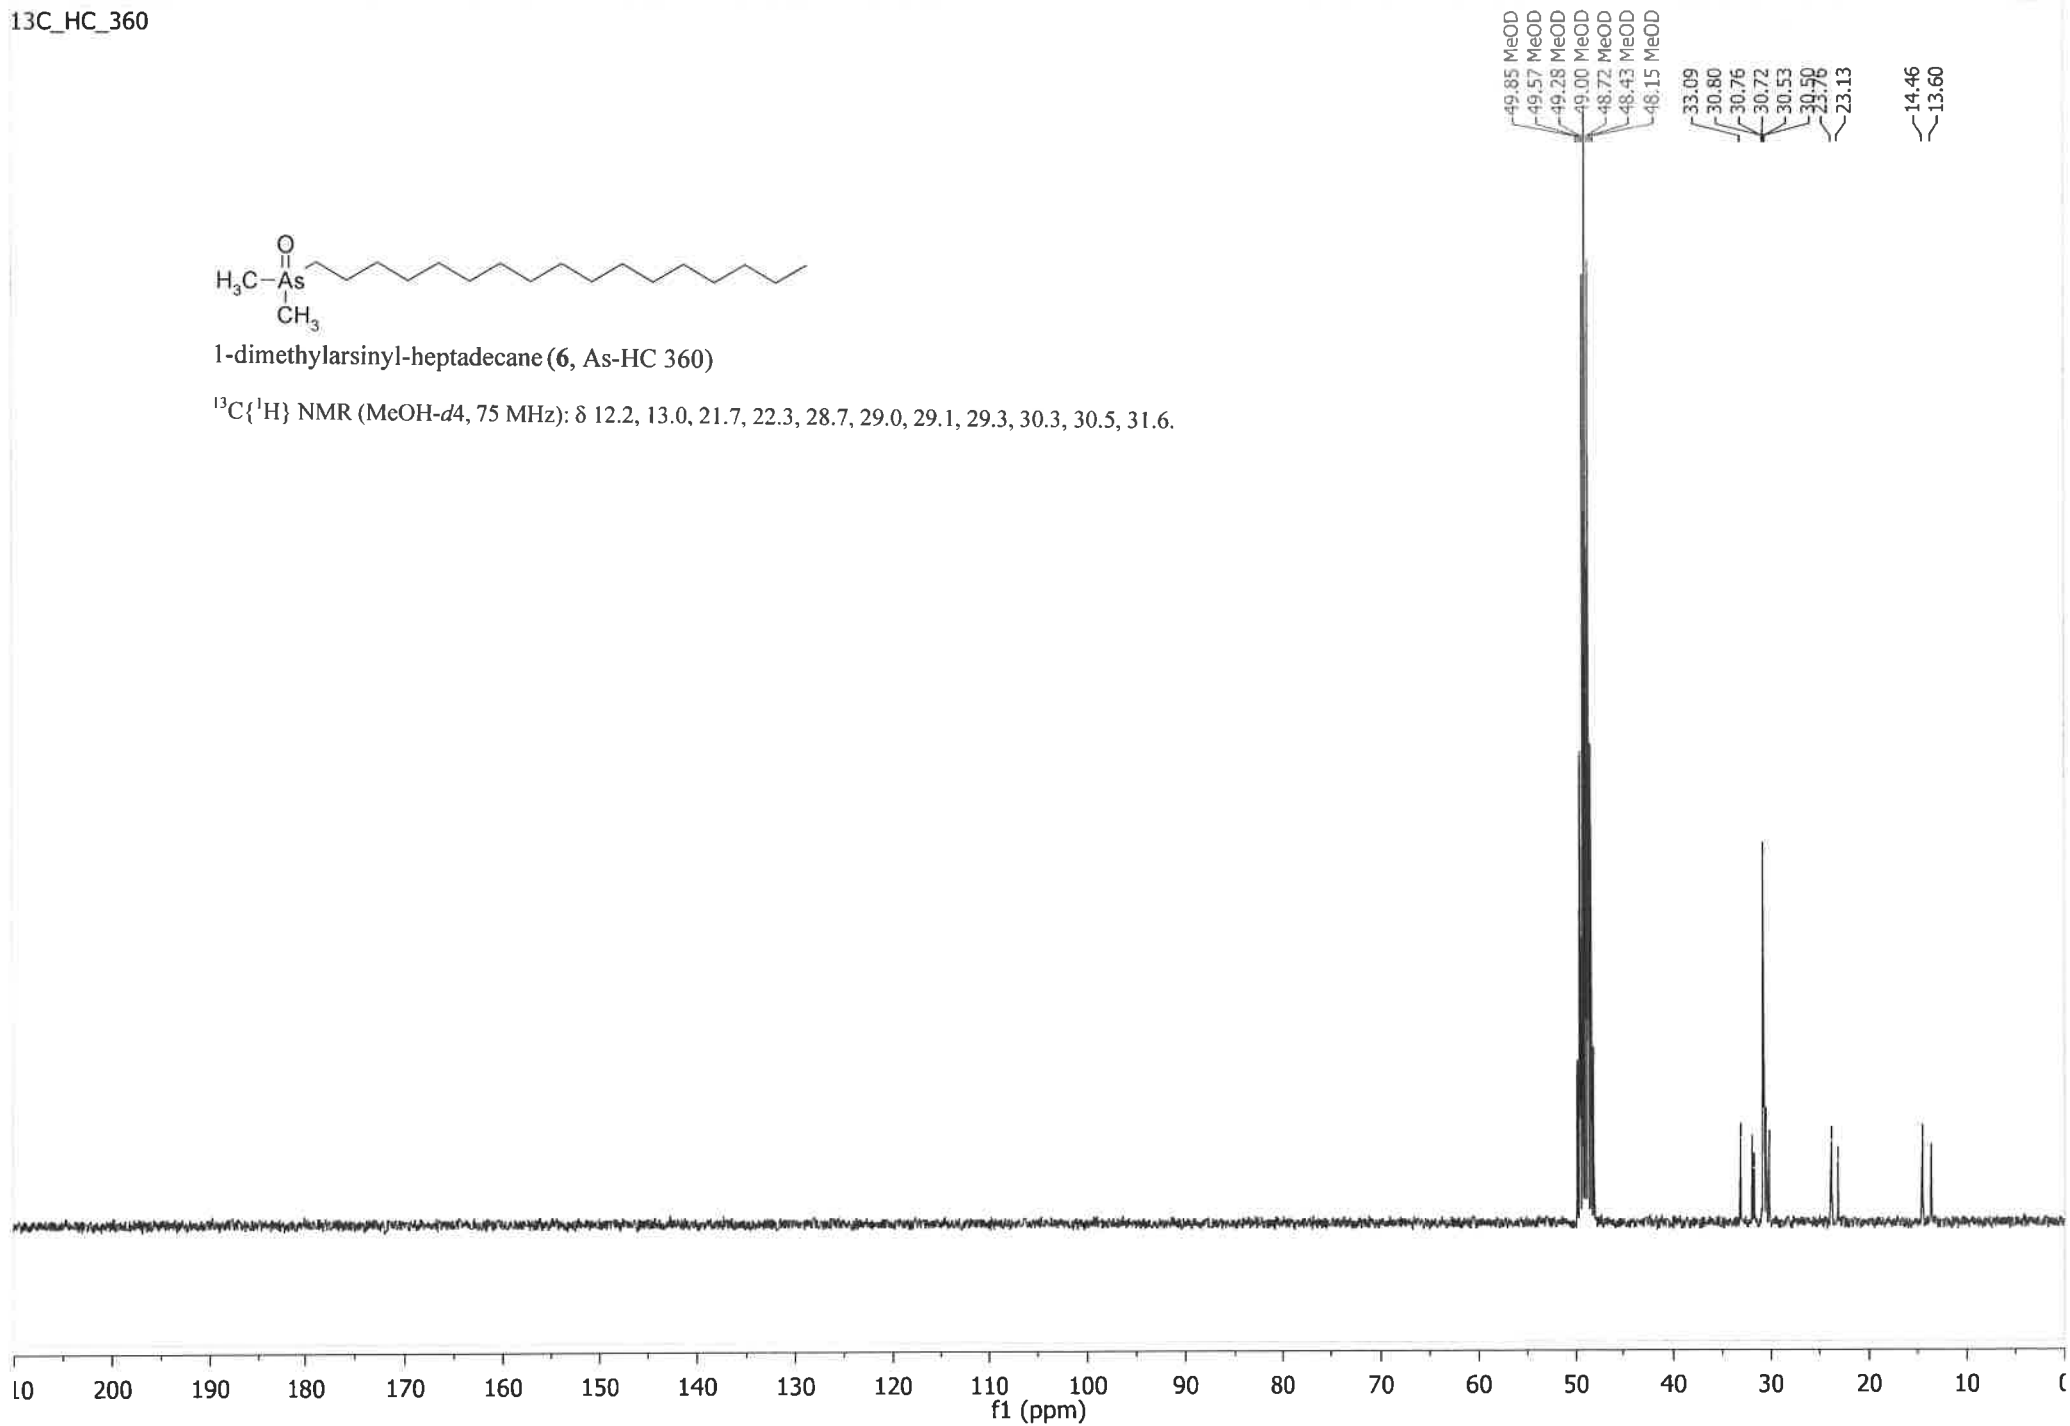

1H\_HC\_444

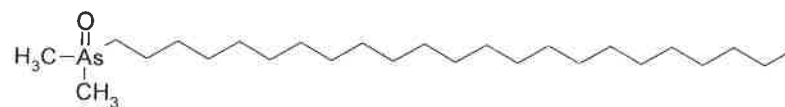

1-Dimethylarsinyltricosane (7, As-HC 444)

<sup>1</sup>H-NMR (MeOH-*d*<sub>4</sub>, 300 MHz): 0.89 (t, *J* = 6.9 Hz, 3H, -CH<sub>3</sub>),  
1.2-1.6 (m, 40H, 20-CH<sub>2</sub>), 1.6 (m, 2H, -CH<sub>2</sub>), 1.7 (s, 6H, -As(CH<sub>3</sub>)<sub>2</sub>),  
2.1 (m, 2H, -As-CH<sub>2</sub>).

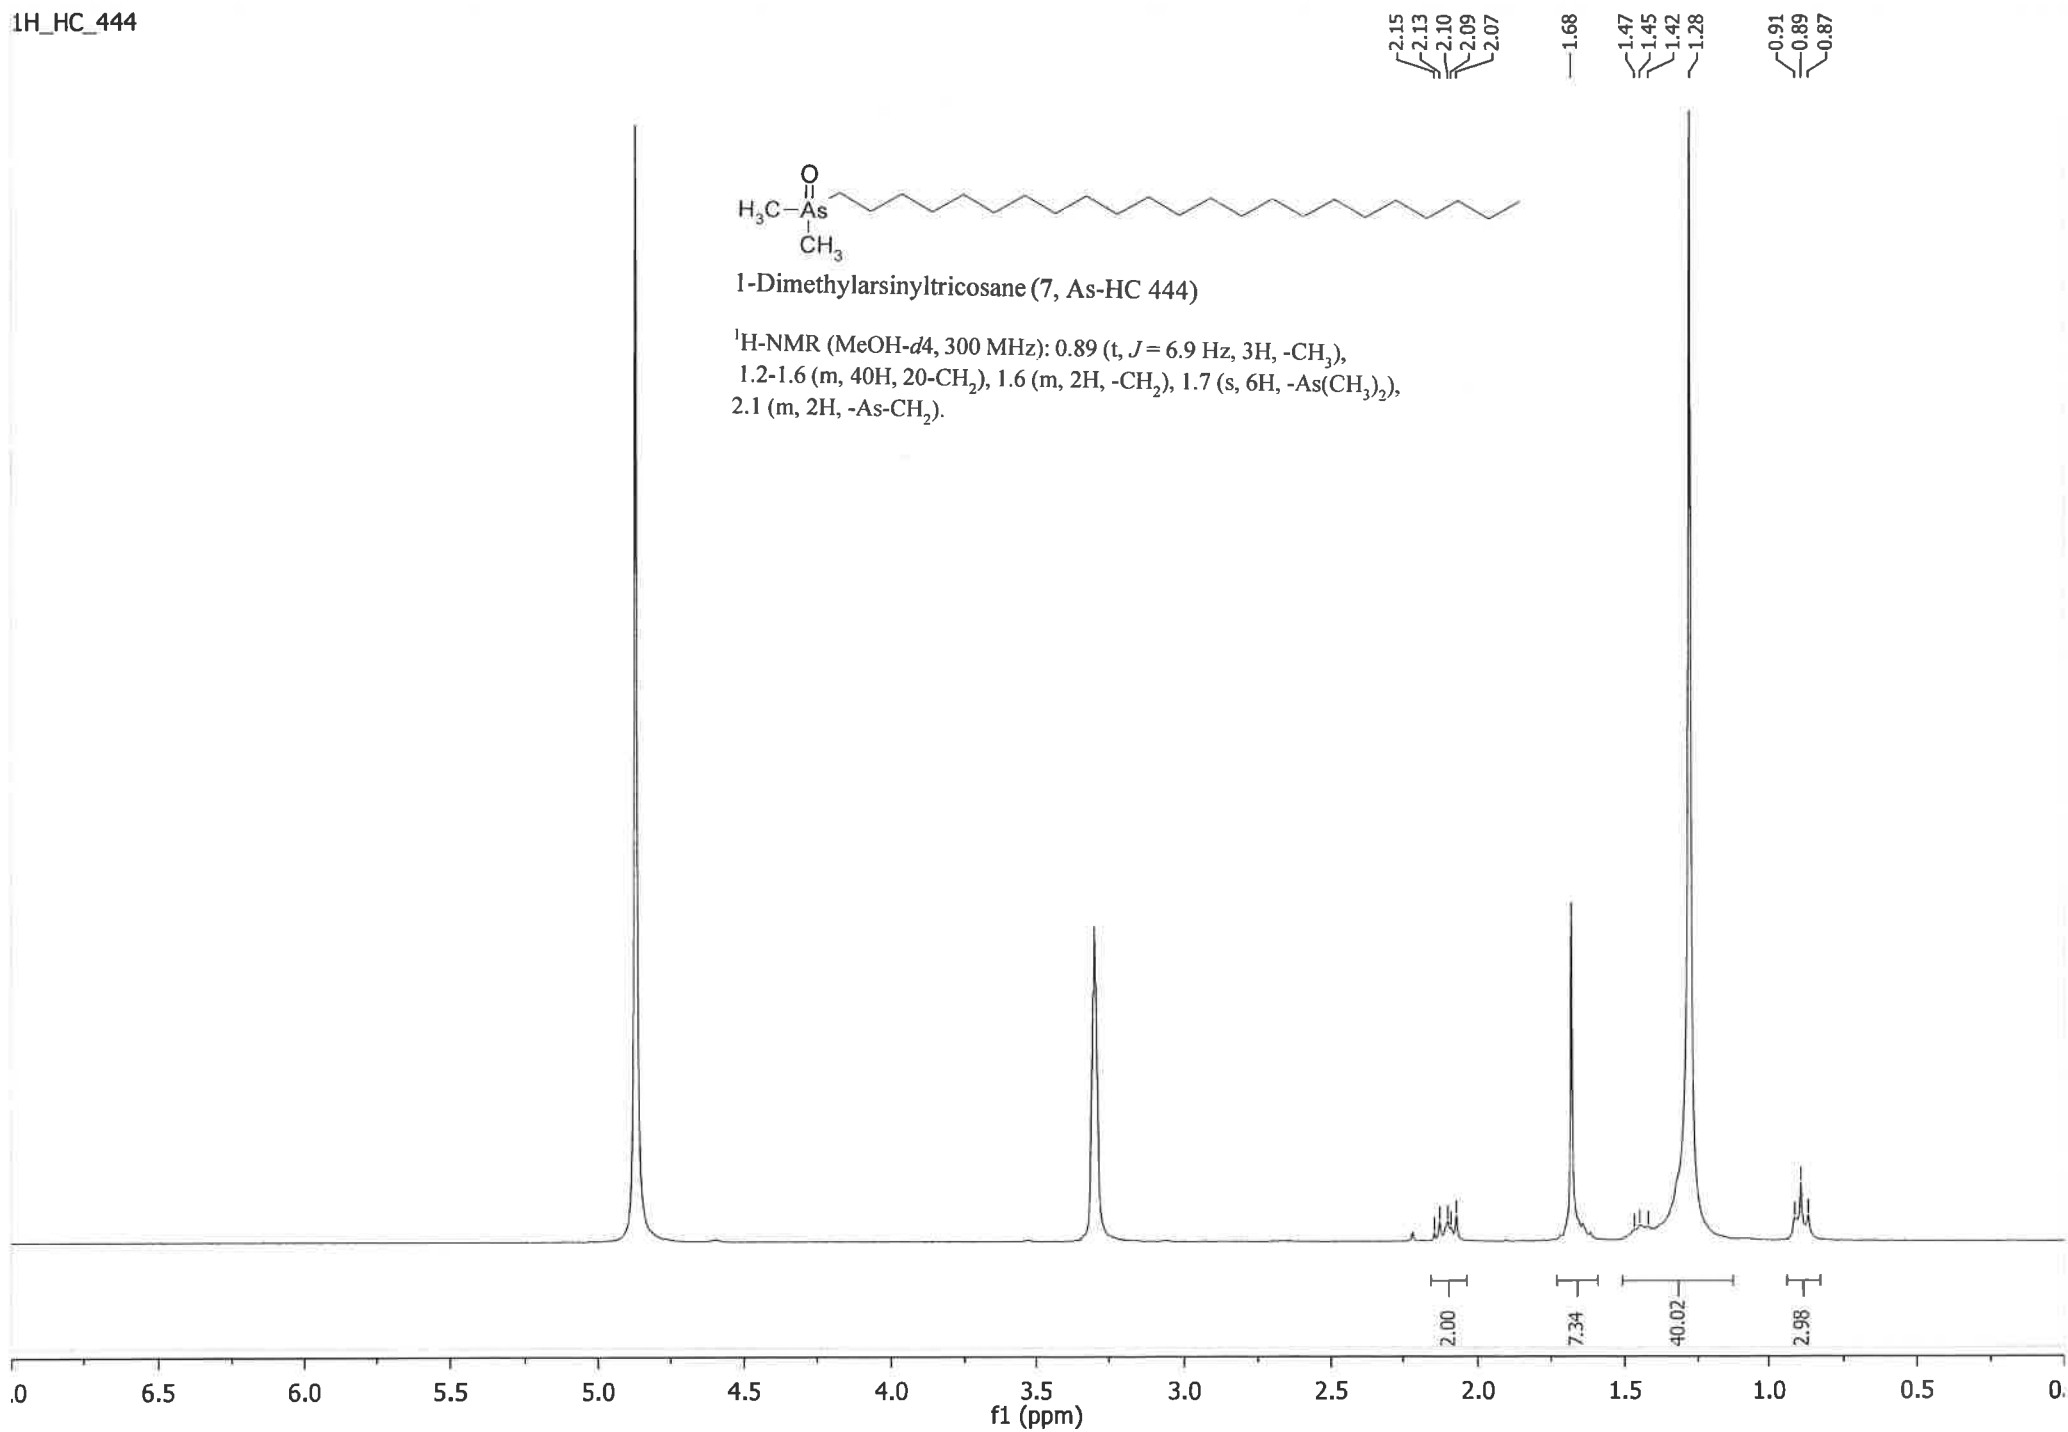

FA 362 acetonitrile

13032601 #1905-2084 RT: 29.43-31.13 AV: 180 NL: 3.08E8

T: FTMS + p ESI Full ms [50.00-400.00]

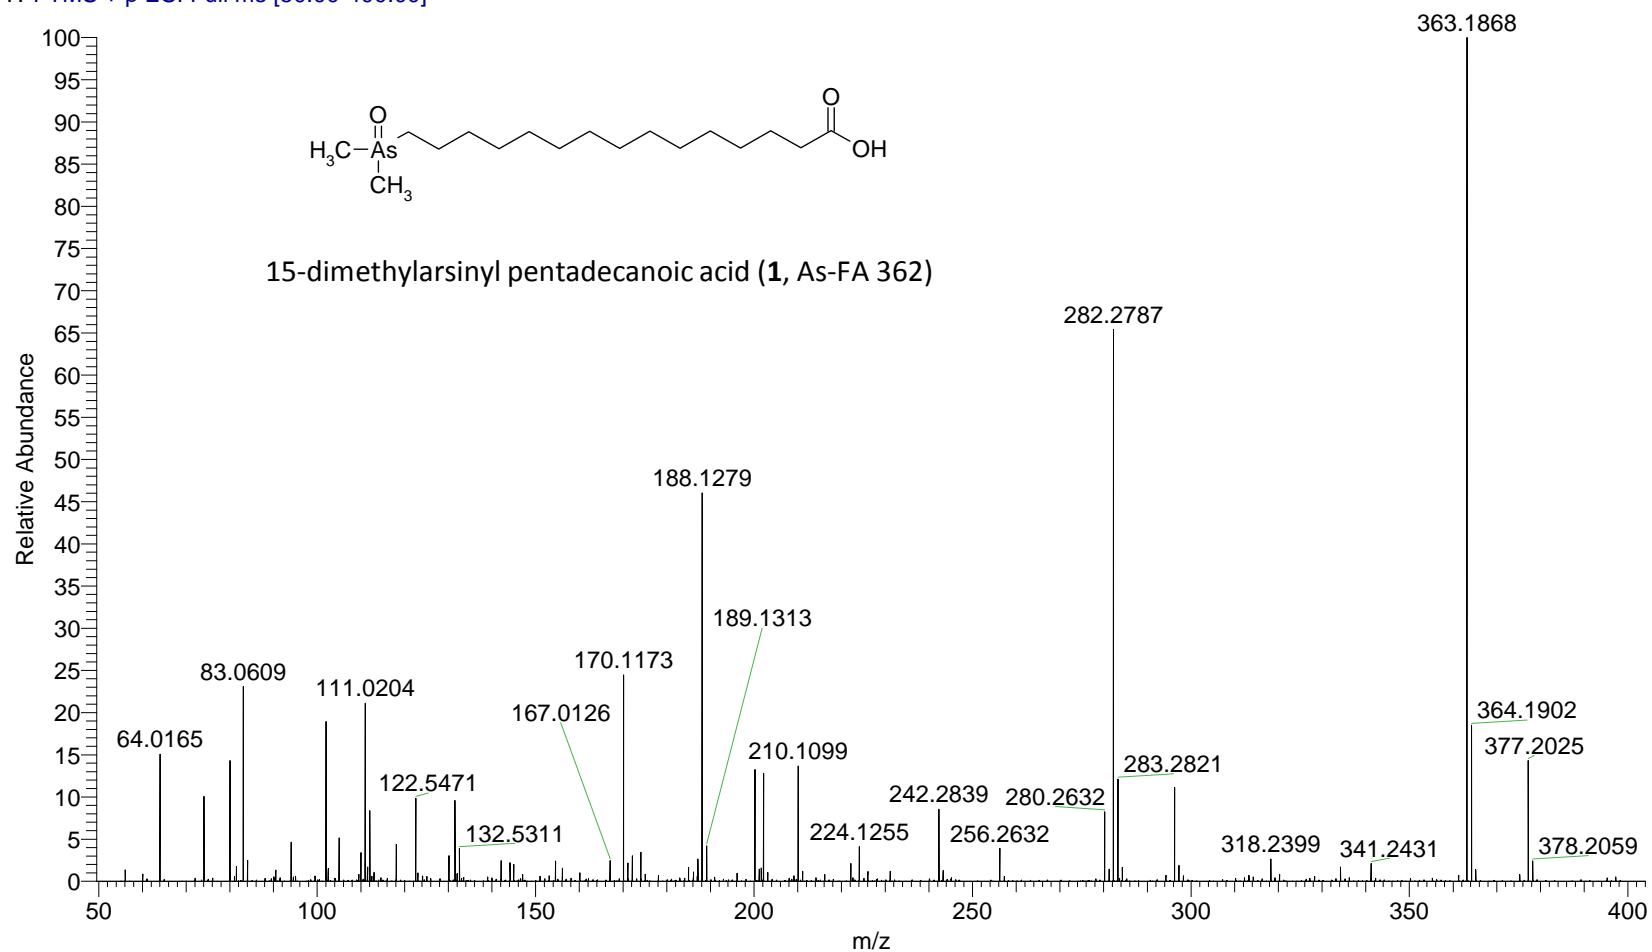

13032601 #1384-1476 RT: 20.73-22.09 AV: 55 NL: 1.03E6

F: FTMS + p ESI Full ms2 363.20@hcd40.00 [50.00-400.00]

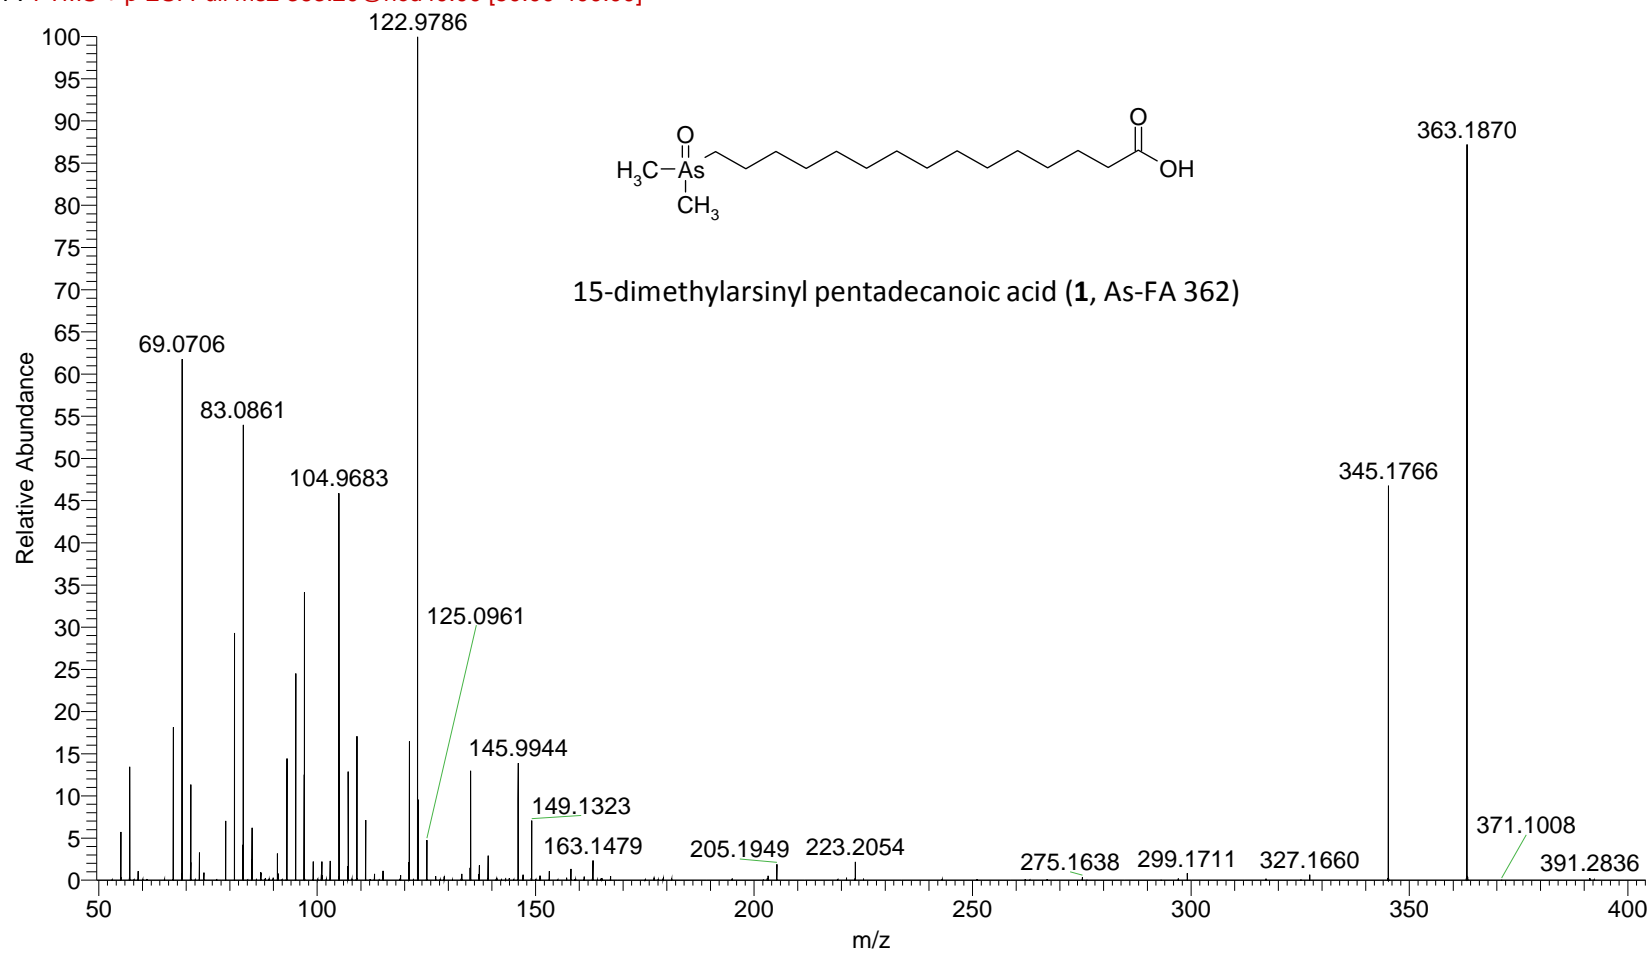



FA As 418 acetonitrile

13032606 #3598-3723 RT: 17.03-17.39 AV: 121 NL: 9.34E6  
T: FTMS + p ESI Full ms [50.00-500.00]

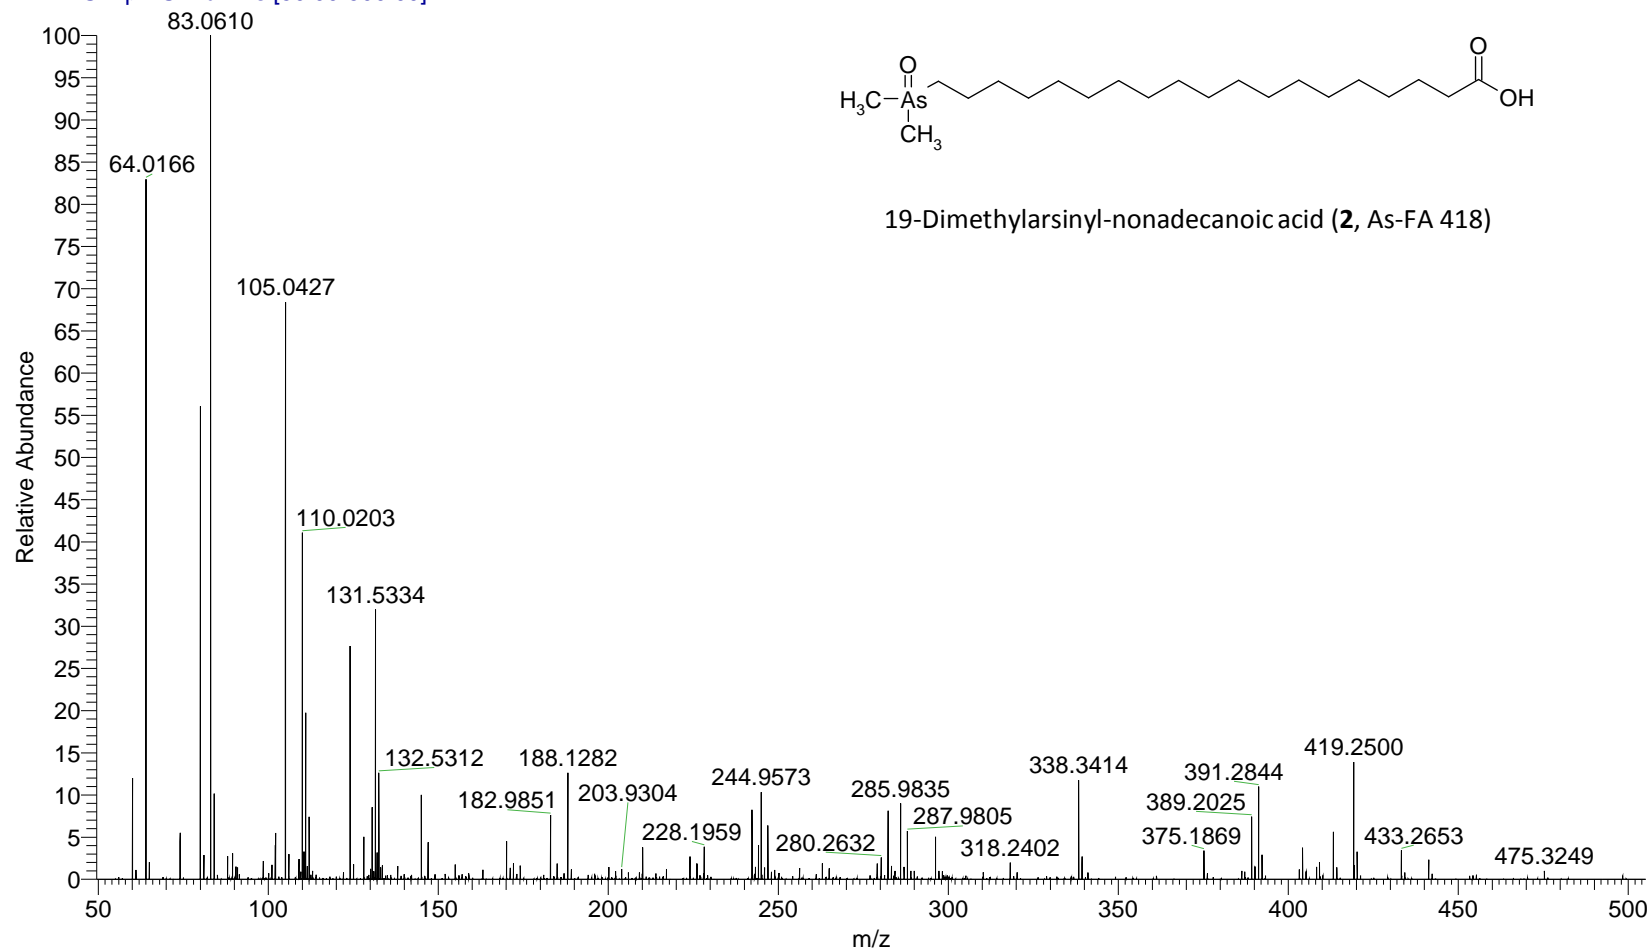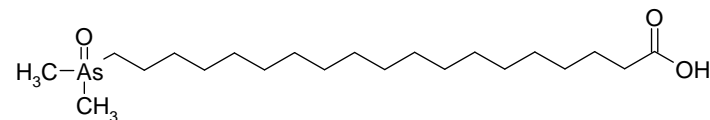

19-Dimethylarsinyl-nonadecanoic acid (**2**, As-FA 418)

13032606 #3787-3823 RT: 18.50-19.21 AV: 37 NL: 1.89E5  
T: FTMS + p ESI Full ms2 419.20@hcd40.00 [50.00-500.00]

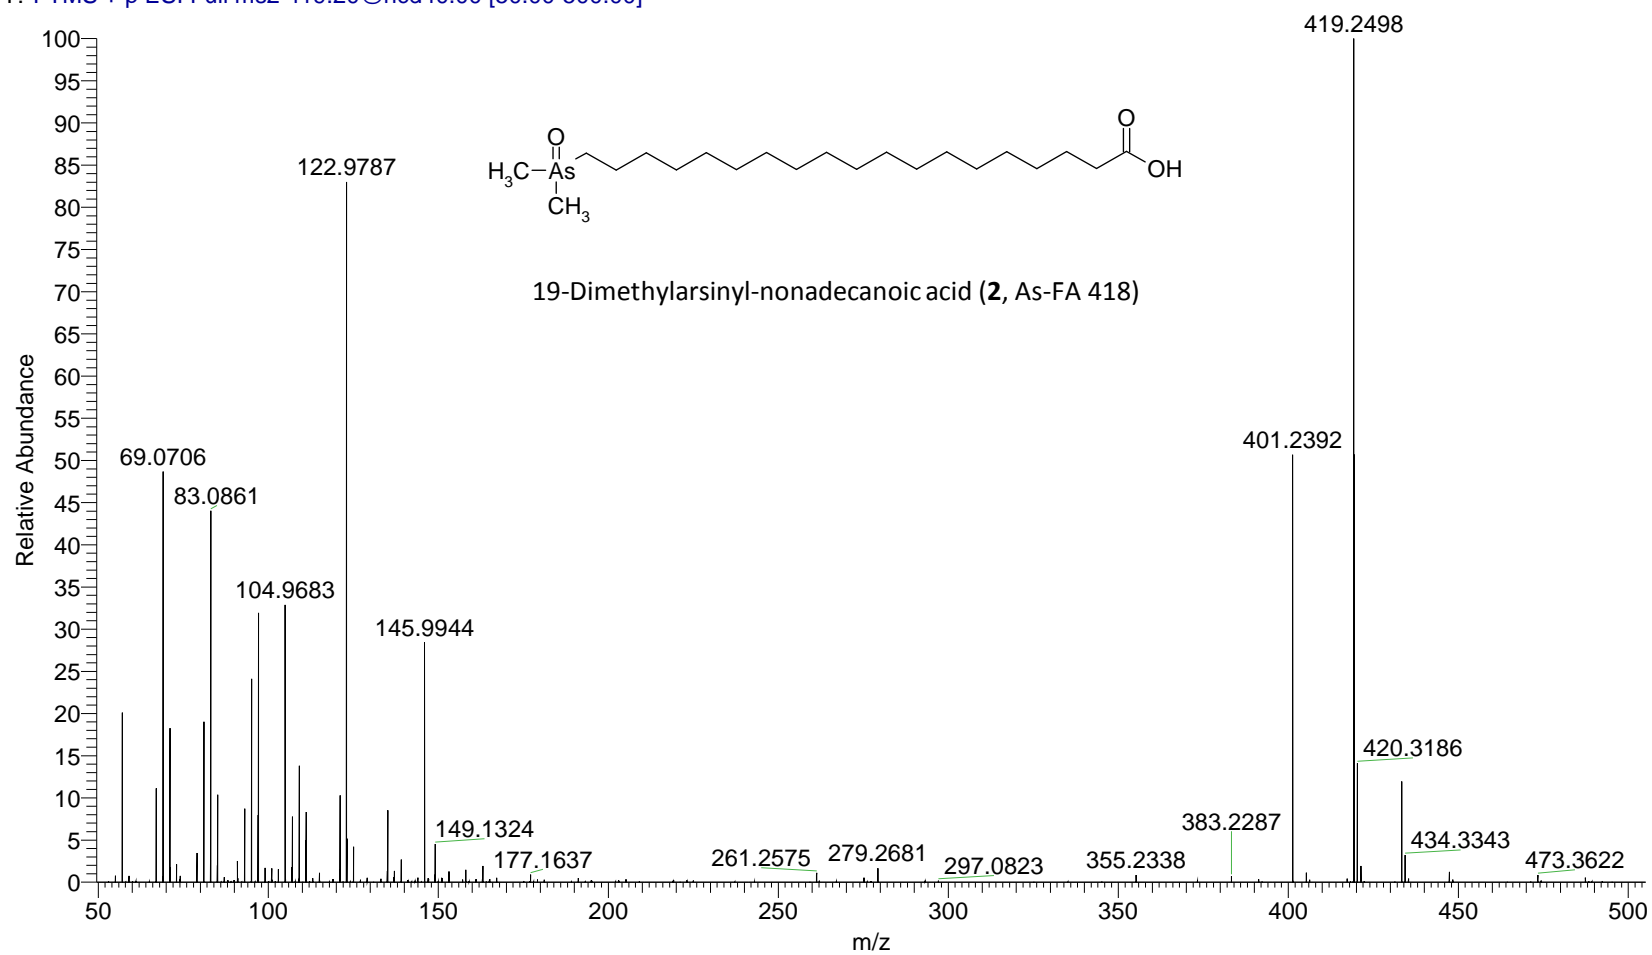

FA 388 acetonitrile

13032605 #1807-1819 RT: 17.94-18.06 AV: 13 NL: 2.50E7

T: FTMS + p ESI Full ms [50.00-500.00]

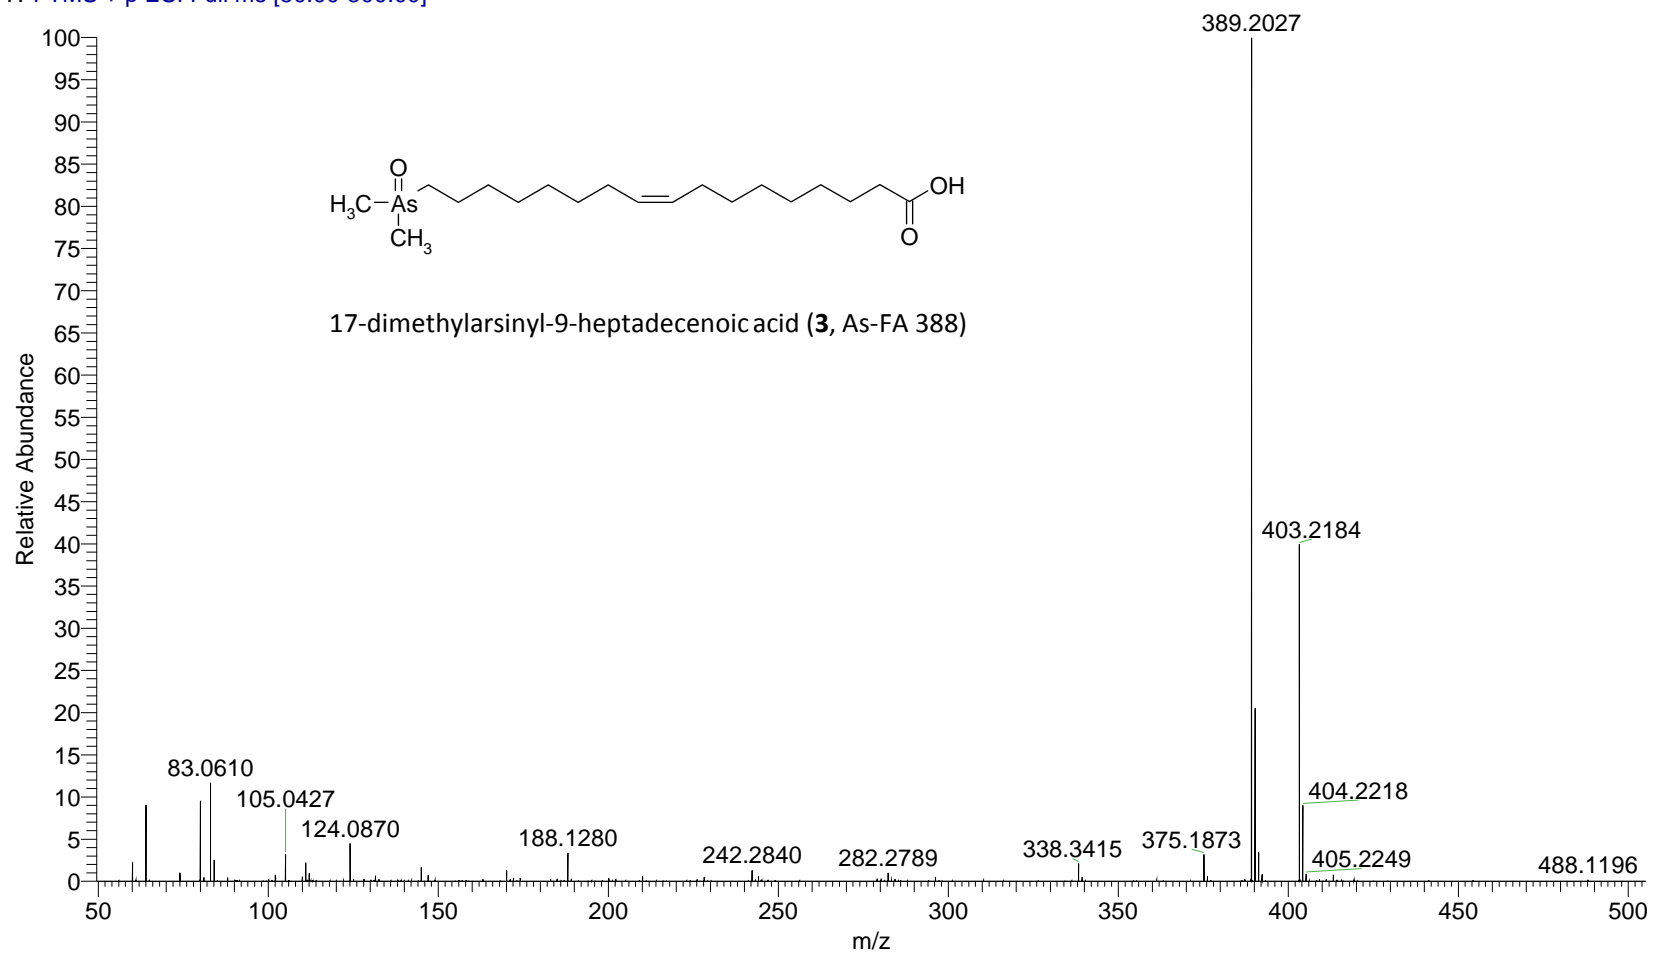

13032605 #1484-1522 RT: 14.95-15.29 AV: 39 NL: 3.27E6  
T: FTMS + p ESI Full ms2 389.20@hcd40.00 [50.00-500.00]

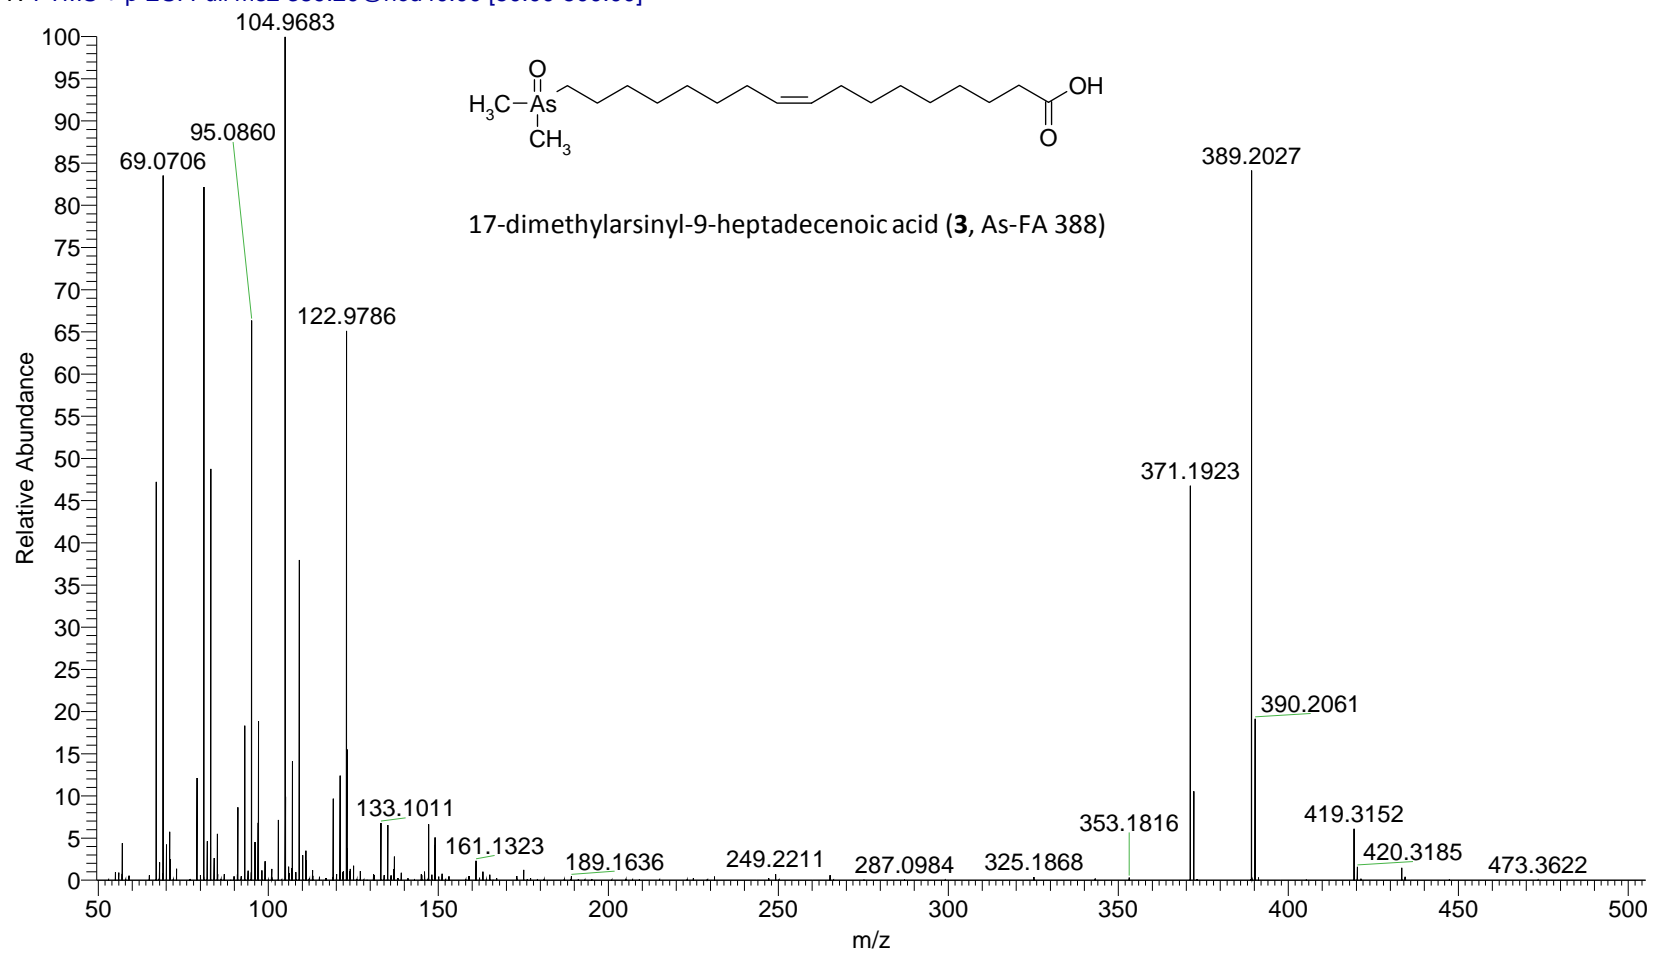

FA 374

13032604 #200 RT: 1.89 AV: 1 NL: 5.89E8

T: FTMS + p ESI Full ms [50.00-500.00]

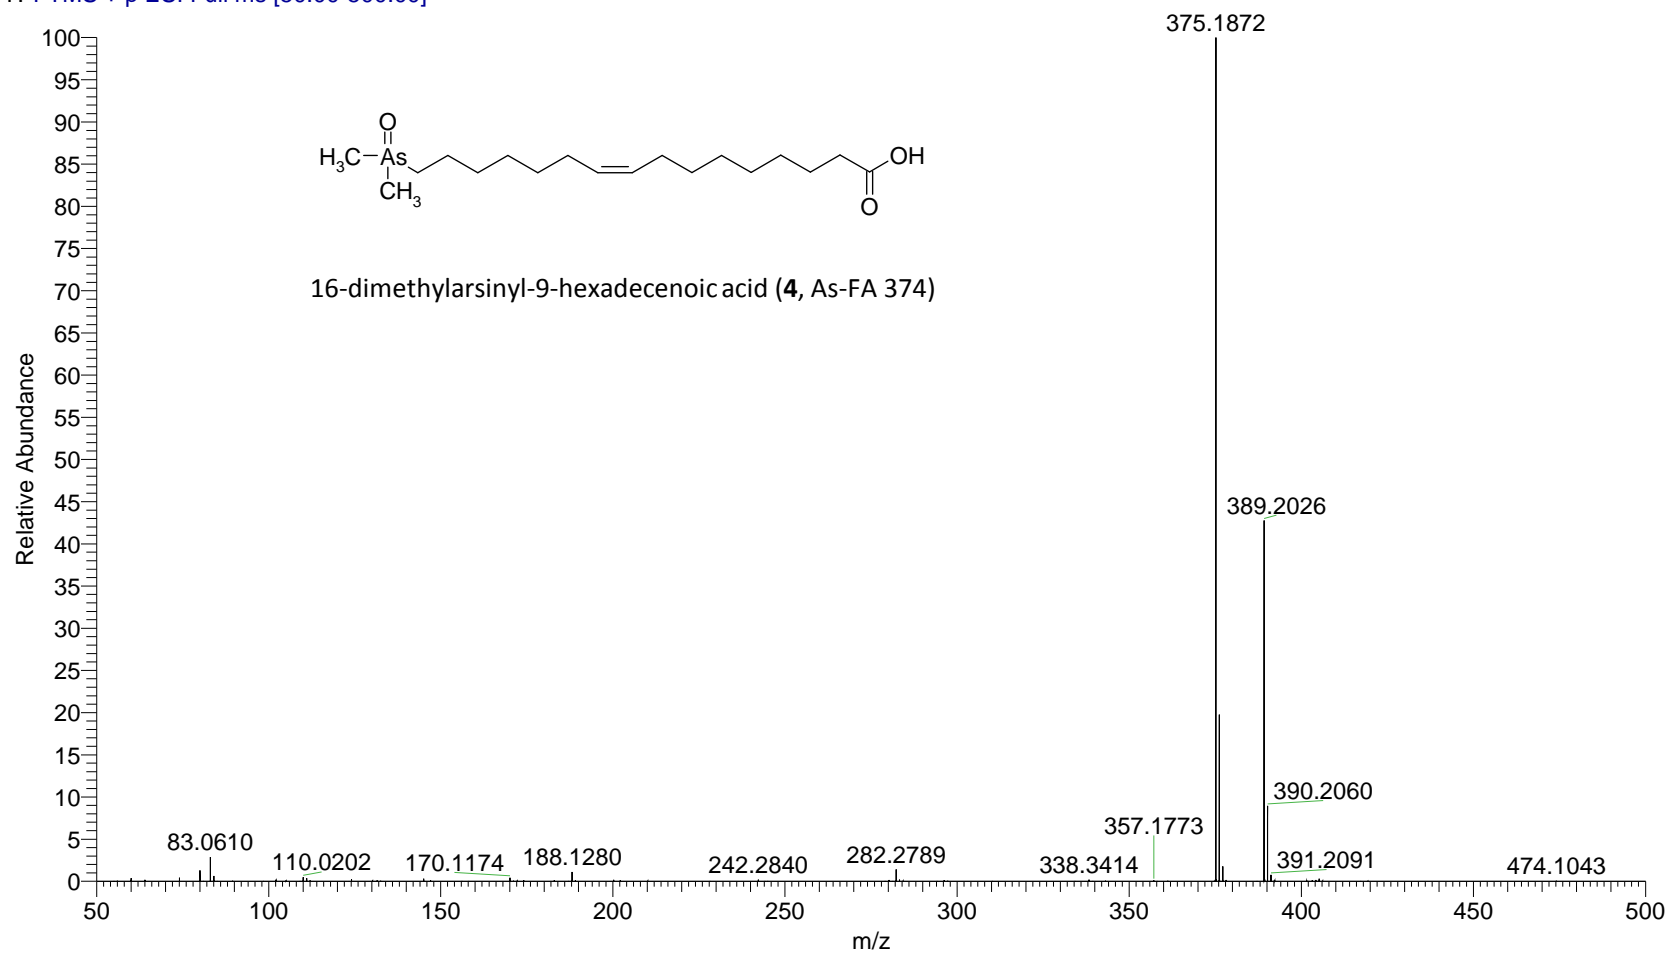

13032604 #827-880 RT: 7.81-8.29 AV: 54 NL: 2.37E7  
F: FTMS + p ESI Full ms2 375.20@hcd40.00 [50.00-500.00]

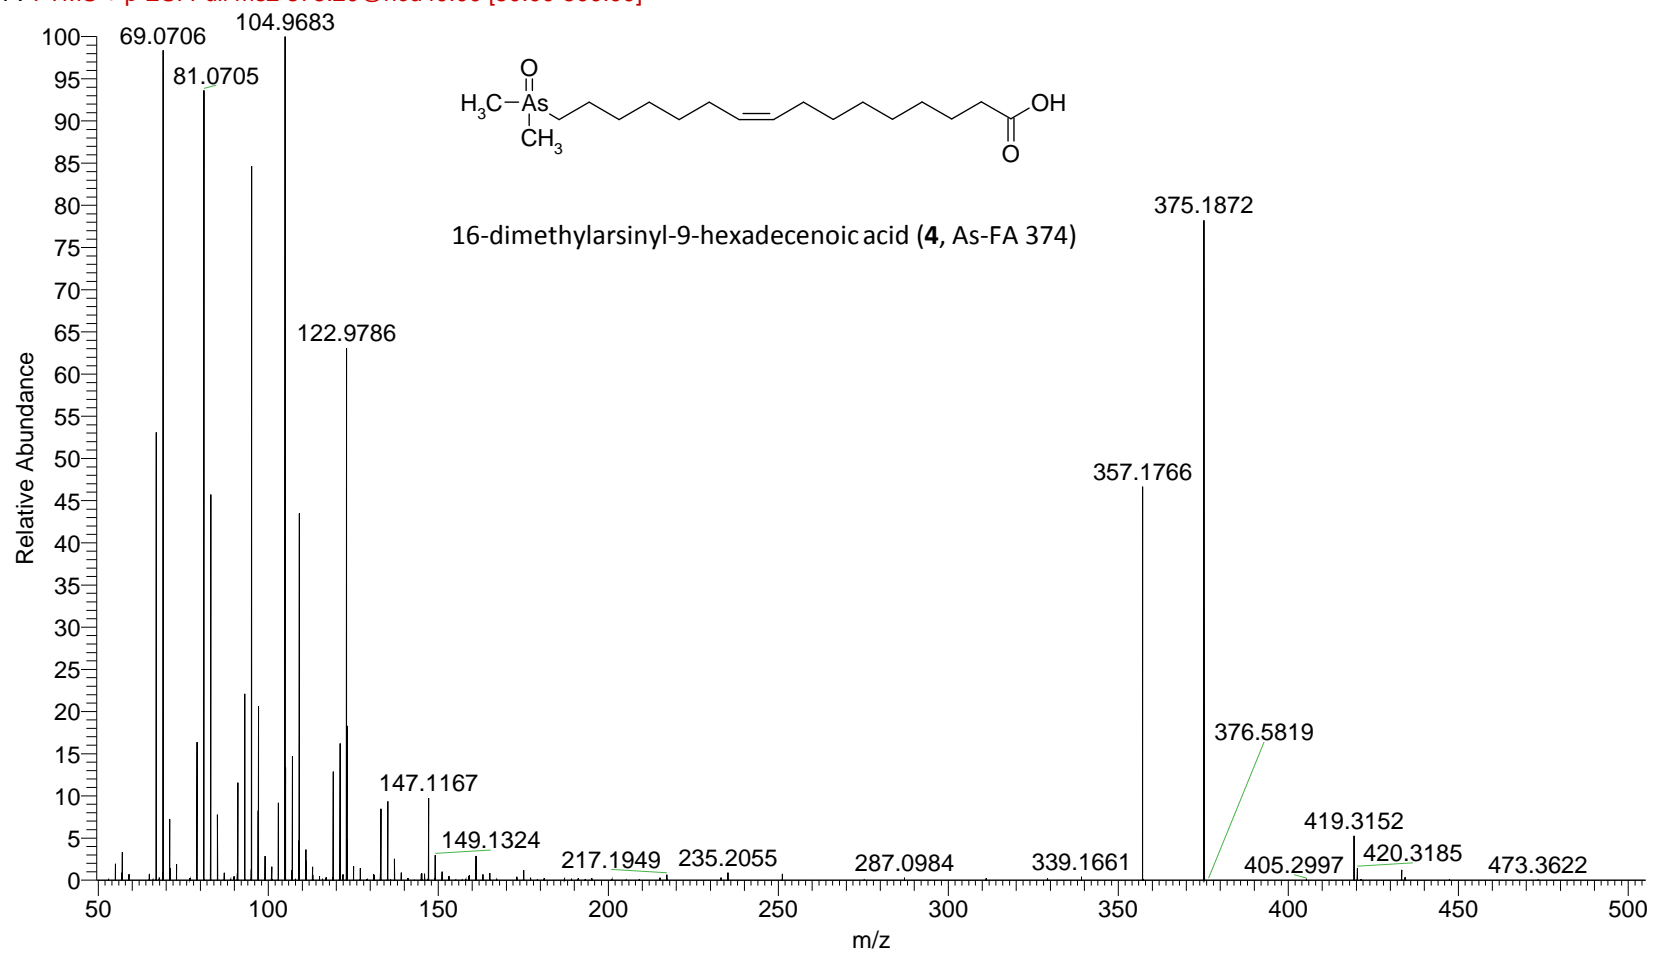

HA 332 acetonitrile

13032501 #667-671 RT: 8.44-8.48 AV: 5 NL: 5.71E8

T: FTMS + p ESI Full ms [50.00-400.00]

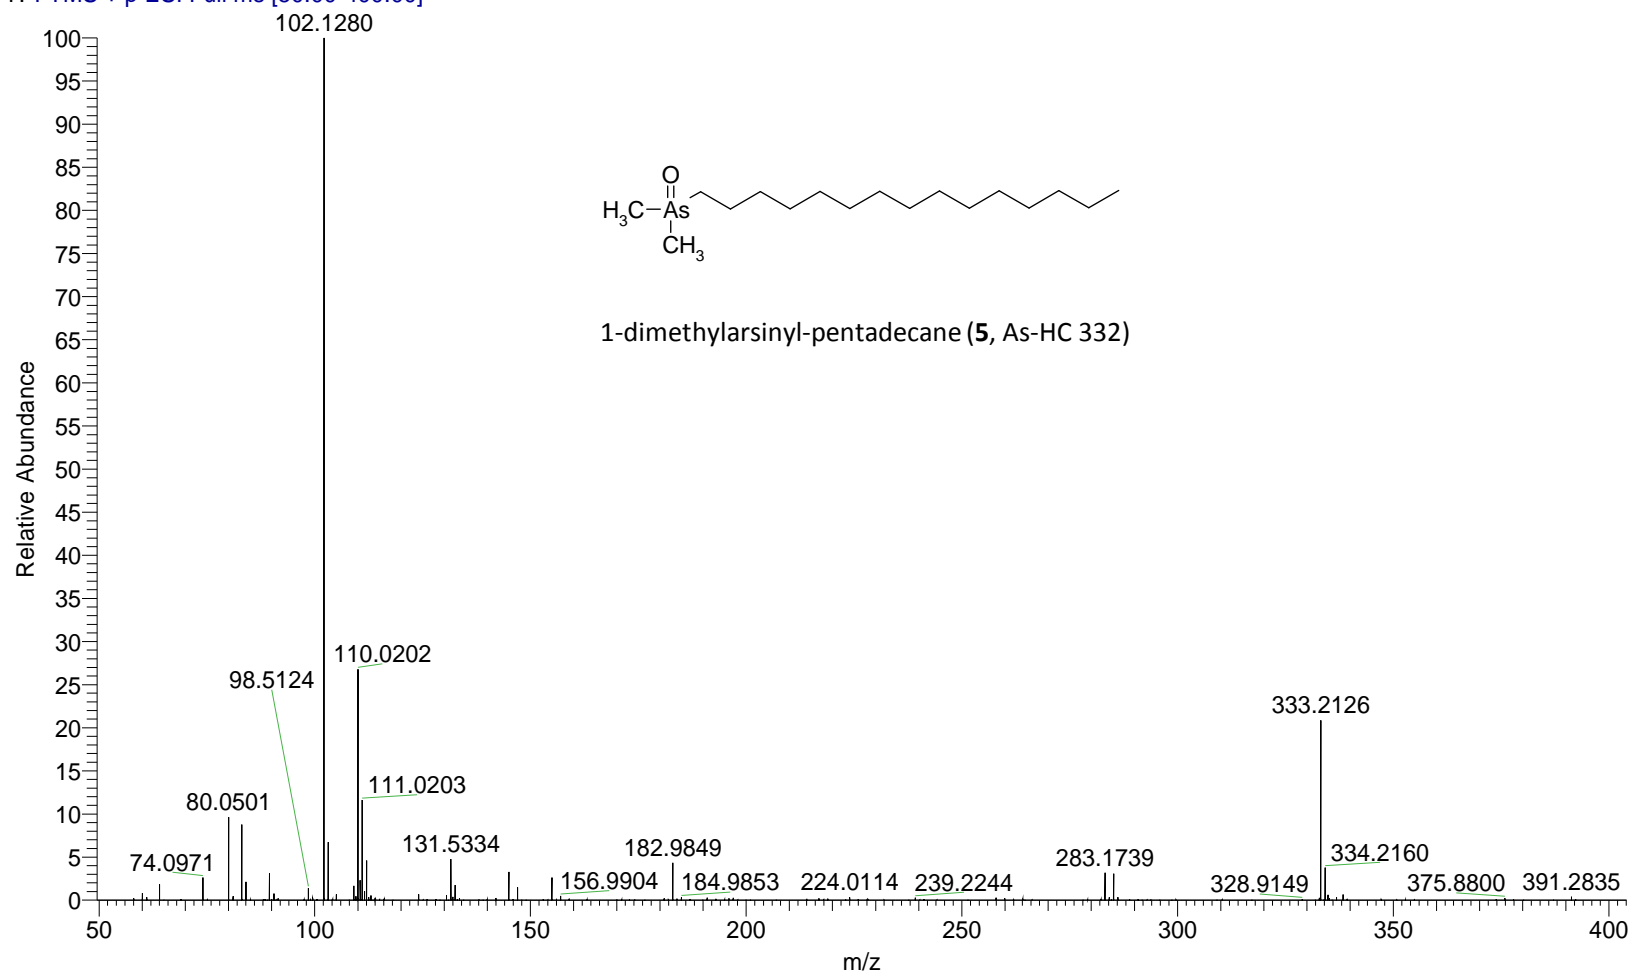

13032501 #124-141 RT: 1.34-1.60 AV: 18 NL: 1.09E7  
T: FTMS + p ESI Full ms2 333.20@hcd30.00 [50.00-400.00]

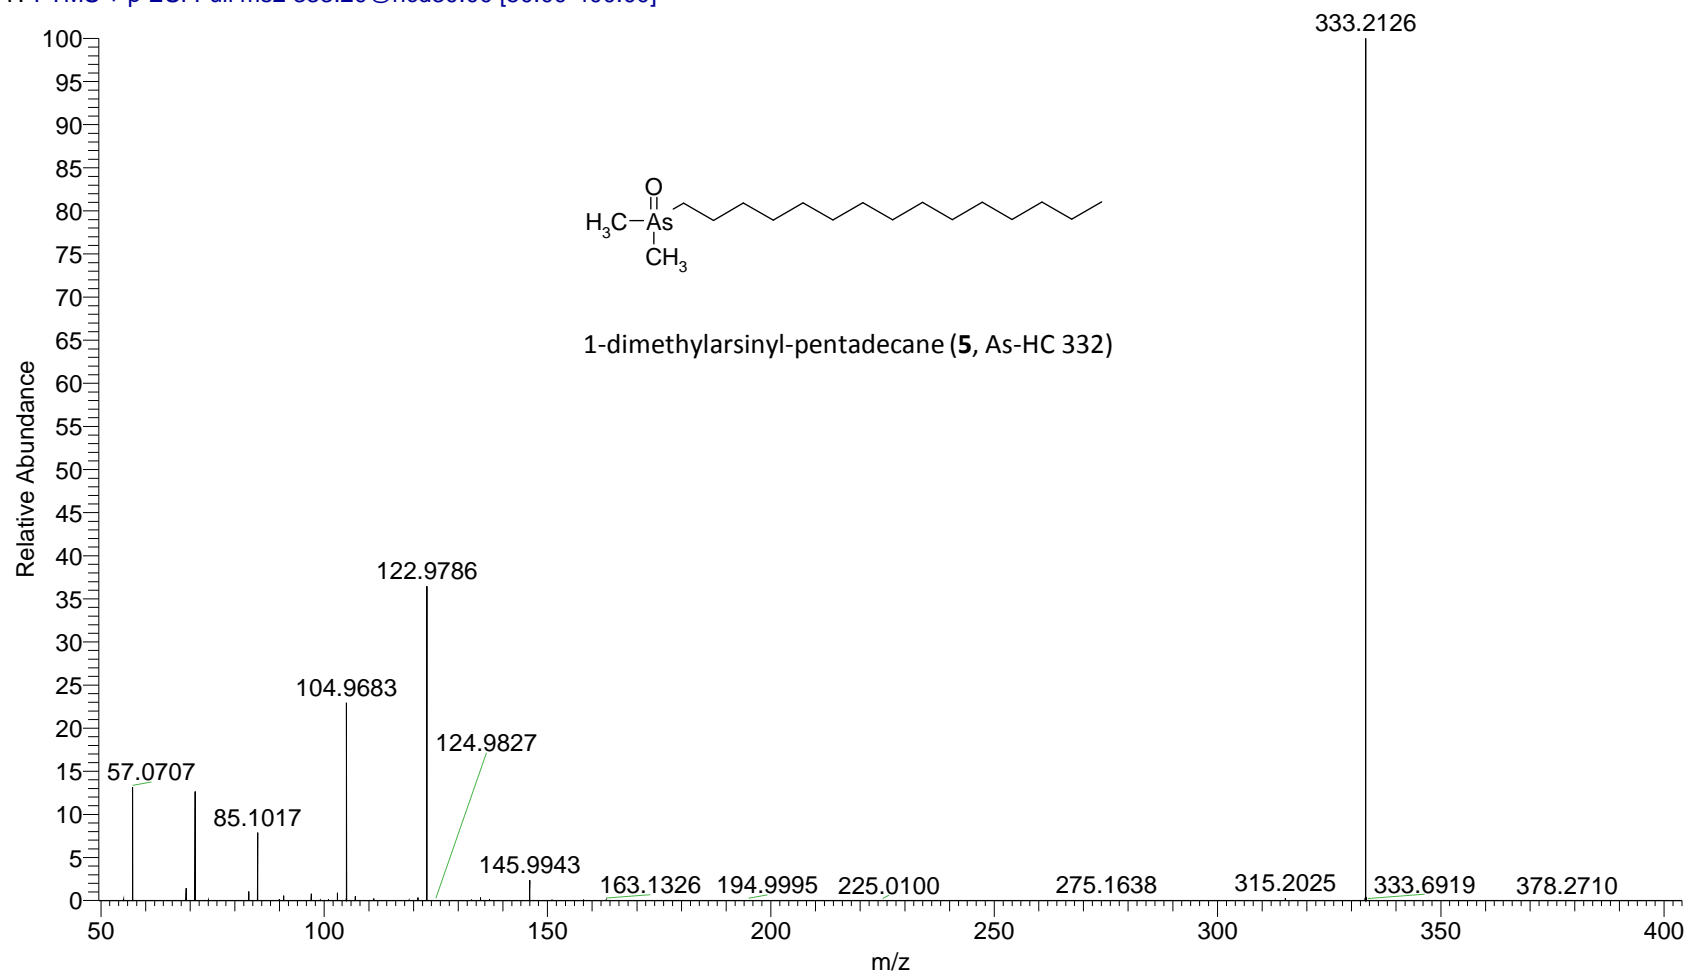



13032602 #706-775 RT: 10.94-11.61 AV: 70 NL: 8.37E7  
T: FTMS + p ESI Full ms [50.00-400.00]

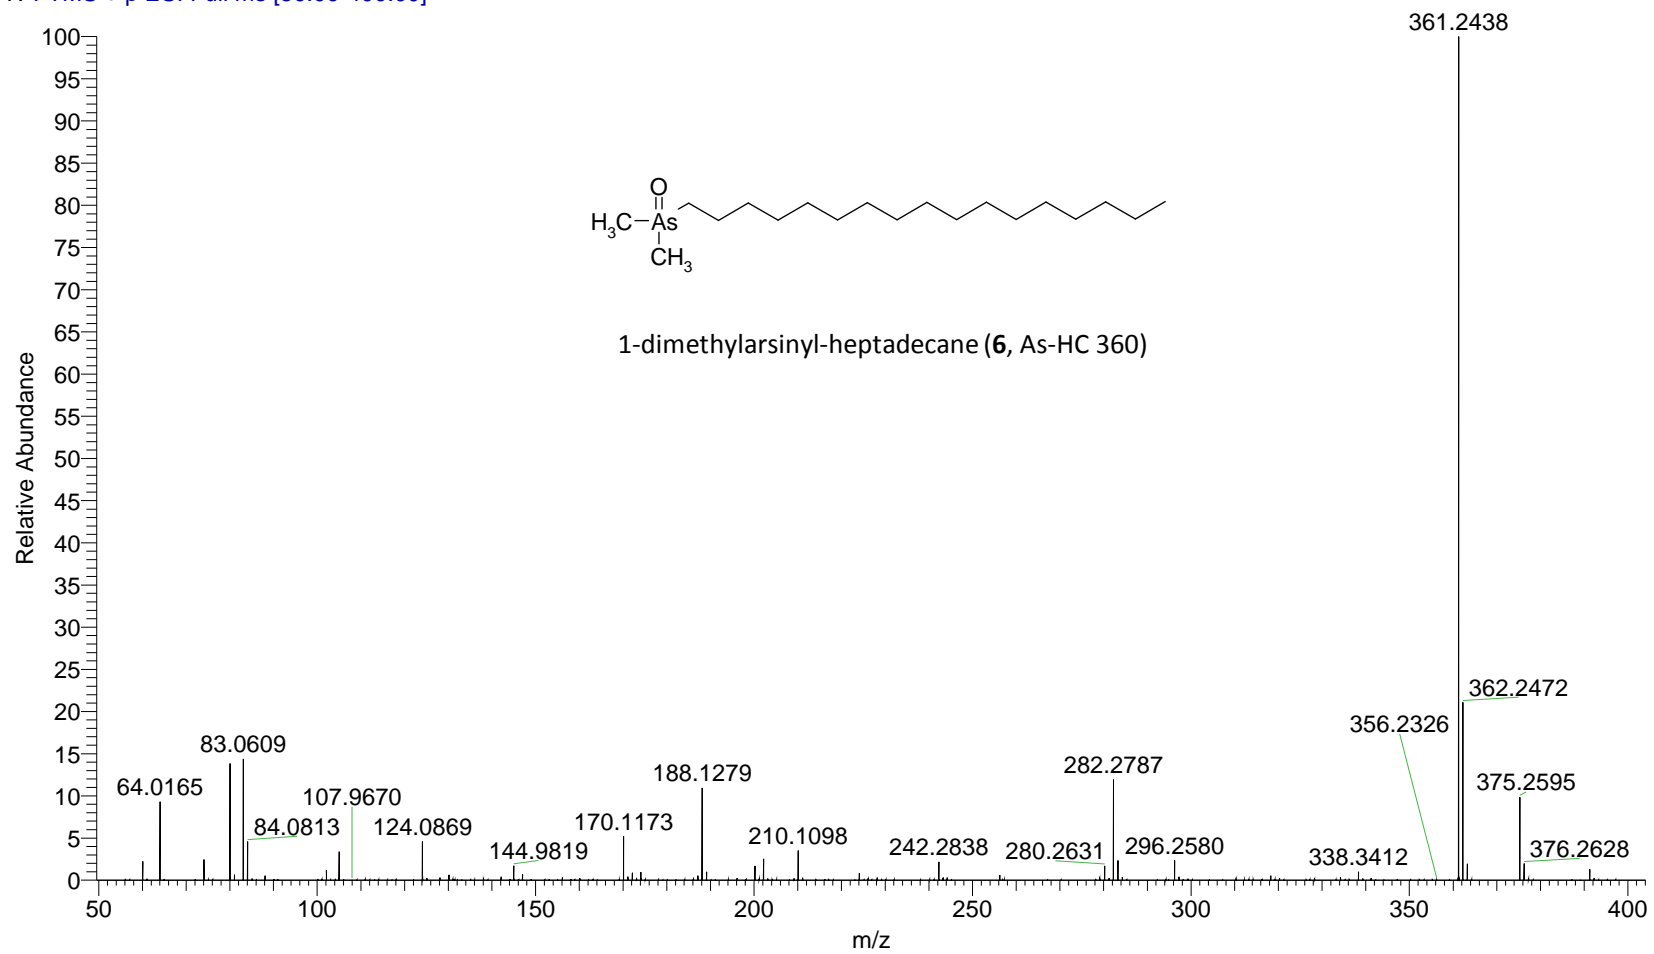

HA 360 acetonitrile

13032602 #274-329 RT: 2.87-3.48 AV: 41 NL: 5.10E6

F: FTMS + p ESI Full ms2 361.20@hcd40.00 [50.00-400.00]

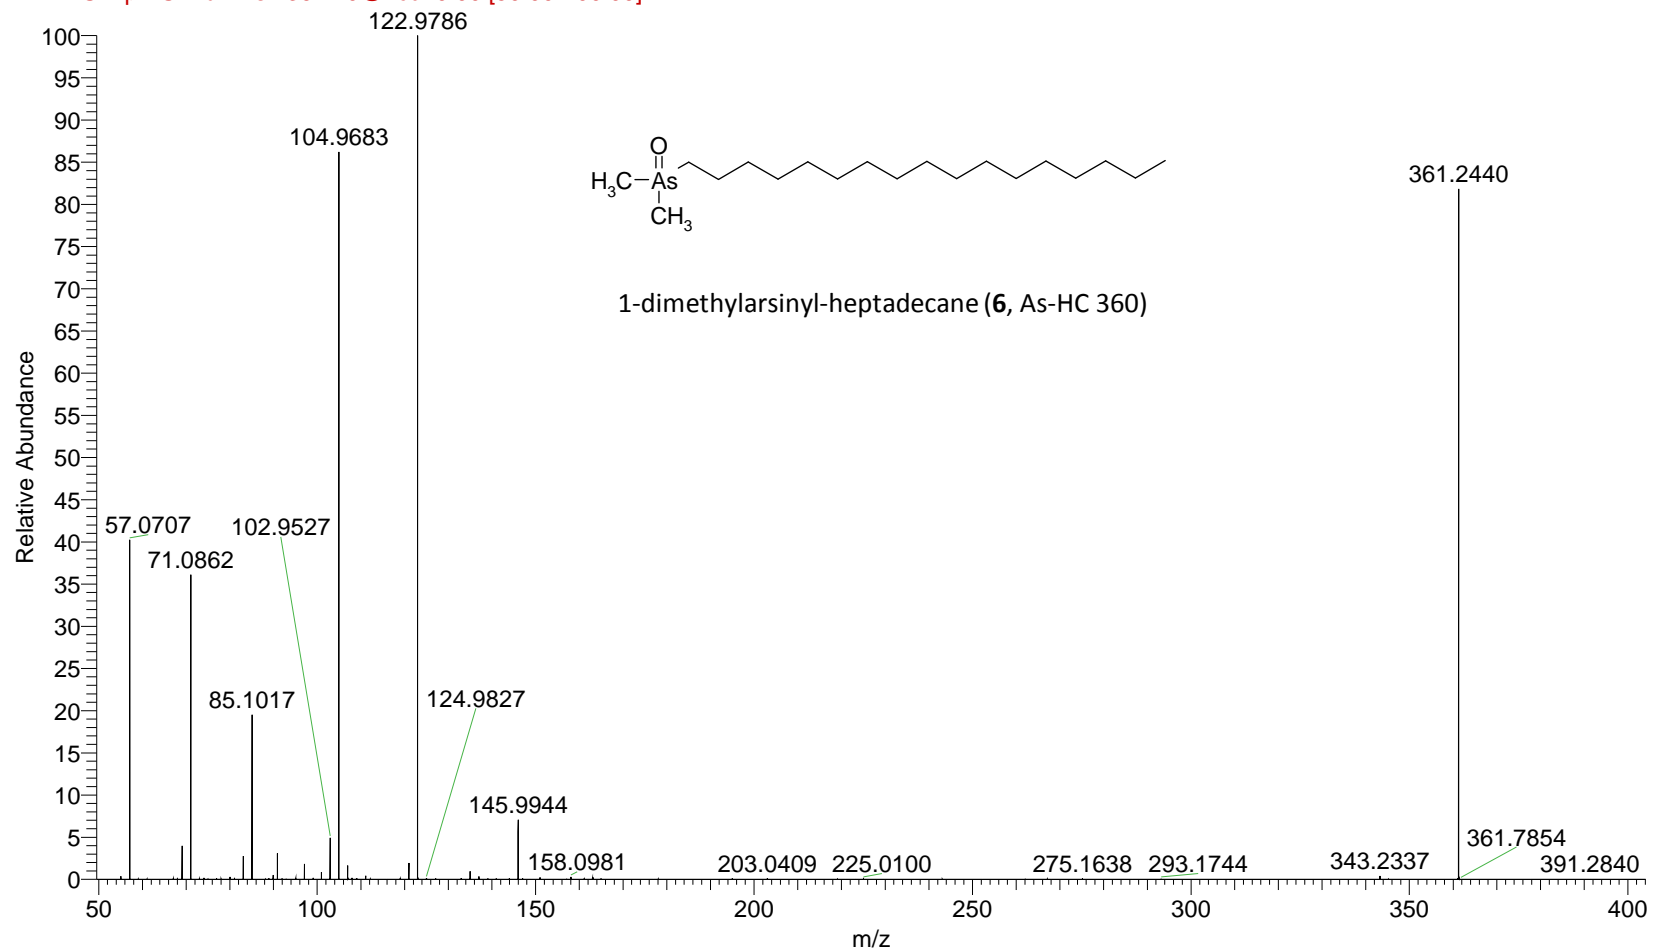

HA 444 acetonitrile

13032603 #645-766 RT: 7.20-8.35 AV: 122 NL: 2.43E8  
T: FTMS + p ESI Full ms [50.00-500.00]

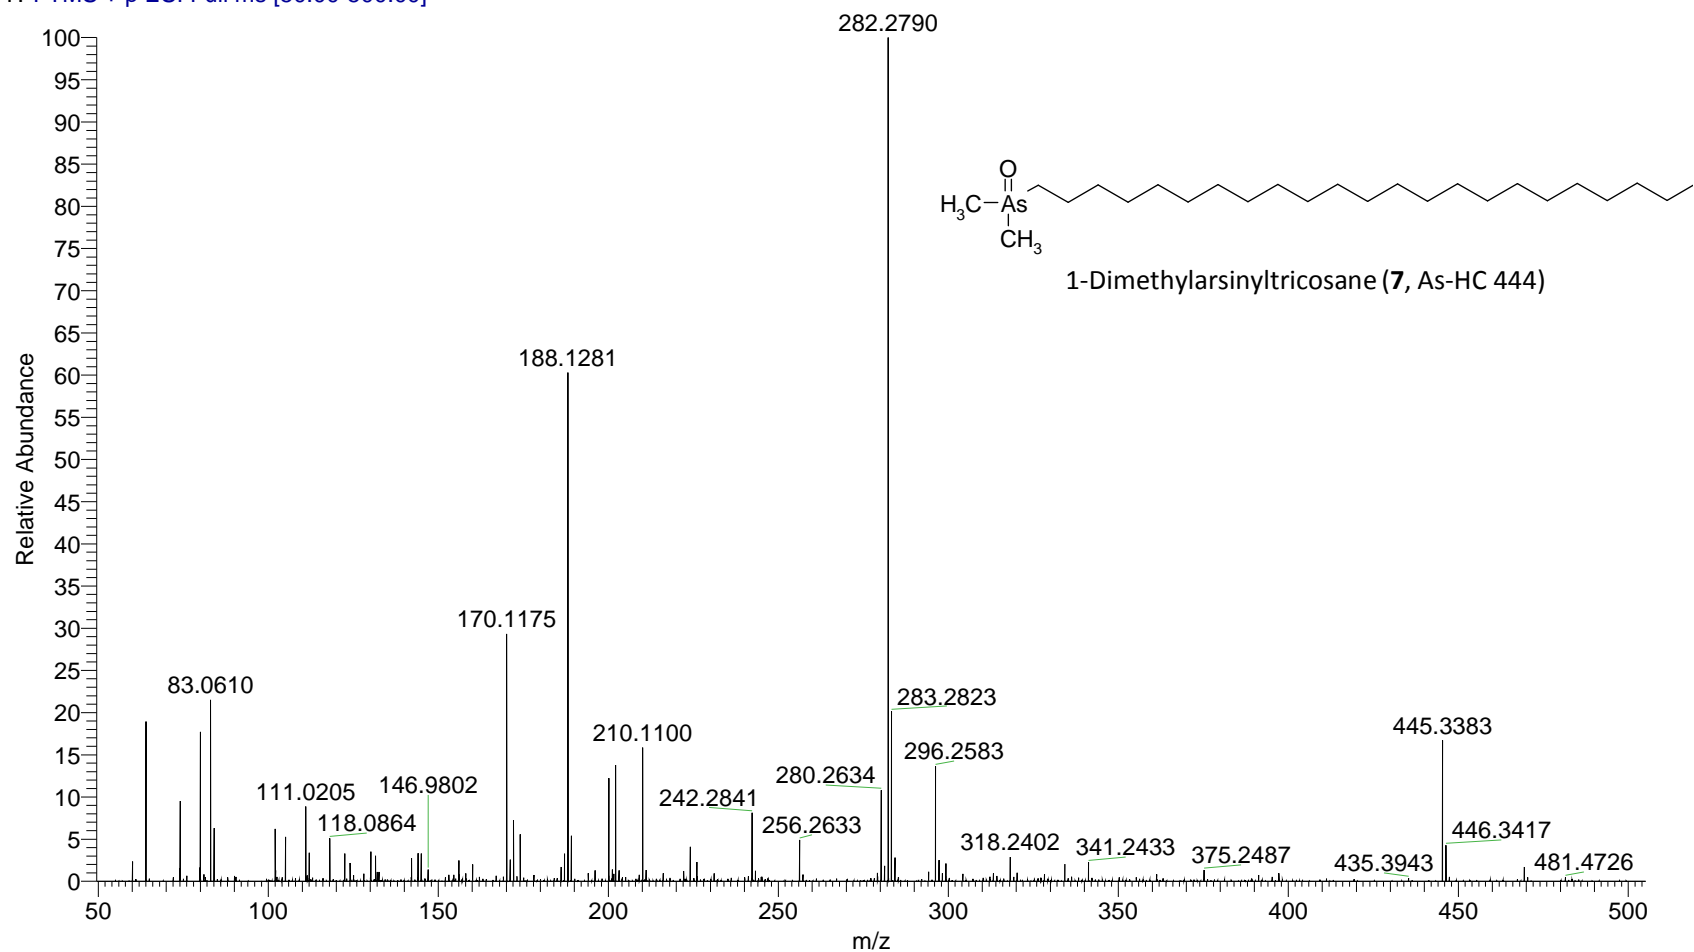

13032603 #112-658 RT: 2.30-4.88 AV: 95 NL: 4.07E6  
F: FTMS + p ESI Full ms2 445.30@hcd40.00 [50.00-500.00]

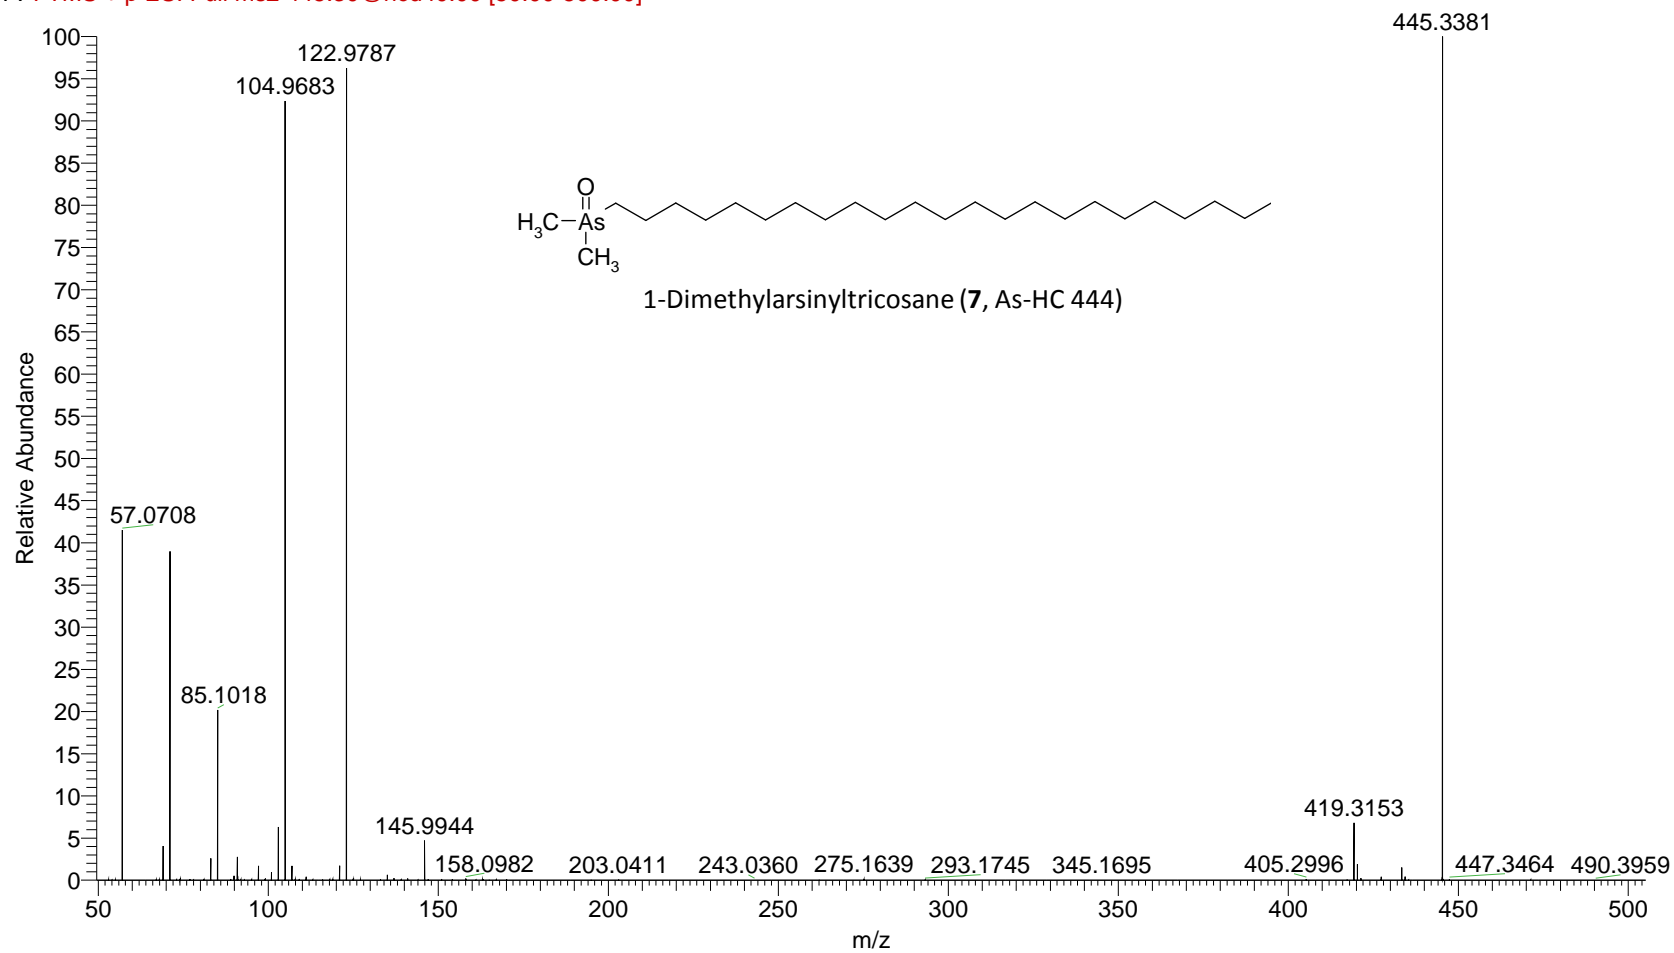

Supplement: om4011092_si_001.pdf [file om4011092_si_001.pdf]
